# Supplementary material for: One Metre Plus (1M+): A Multifunctional Open-Source Sensor for Bicycles Based on Raspberry Pi
Source: MDPI journal article supplement (doi:10.3390/s21175812), 2021-08-29

**Supplementary material for the article: One meter plus (1M+), a multifunctional open source sensor for bicycles based on raspberry pi.**

## **1. Detailed list of products**

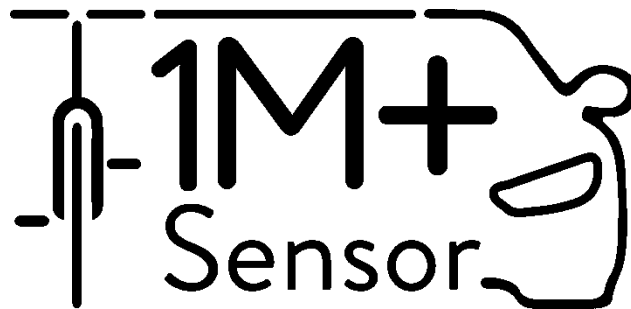

### **Article:**

Andres Henao (carlosa.henaof@inrs.ca)  
Philippe Apparicio (philippe.apparicio@inrs.ca)  
David Maignan (davidmaignan@gmail.com)

### **Hardware:**

Andres Henao (carlosa.henaof@inrs.ca)

### **Software:**

Andres Henao (carlosa.henaof@inrs.ca)  
David Maignan (davidmaignan@gmail.com)

### **Supervisor:**

Philippe Apparicio (philippe.apparicio@inrs.ca)

# One meter plus (1M+)

## A multifunctional open source sensor for bicycles based on raspberry pi.

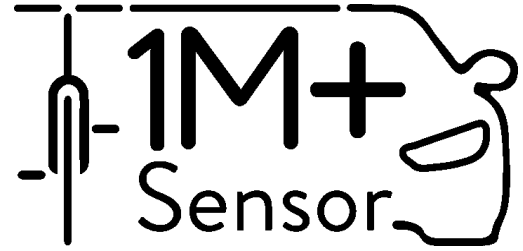

### Detailed list of products

| Item | Quantity          | Name                                       | Manufacturer                            |
|------|-------------------|--------------------------------------------|-----------------------------------------|
| 1    | 1                 | Bottom case                                | 3d printed                              |
| 2    | 1                 | Top cover                                  | 3d printed                              |
| 3    | 1                 | Distance sensor support                    | 3d printed                              |
| 4    | 1                 | Camera support                             | 3d printed                              |
| 5    | 1                 | Touch screen support                       | 3d printed                              |
| 6    | 1                 | Acrylic cover                              | 3d printed                              |
| 7    | 1                 | Raspberry pi support                       | 3d printed                              |
| 8    | 1                 | Charger support                            | 3d printed                              |
| 9    | Standard products |                                            |                                         |
| 9.1  | 1                 | RAM® ball support diamond                  | RAM® B 238U (Seattle, Washington, USA)  |
| 9.2  | 1                 | RAM® double socket arm                     | RAM® B 400U (Seattle, Washington, USA)  |
| 9.3  | 1                 | RAM® tough claw                            | RAM® B 201U (Seattle, Washington, USA)  |
| 9.4  | 1                 | HW-775 Charger                             | Makerfocus (China)                      |
| 9.5  | 1                 | SD Card 64 Gb                              | Samsung (Seoul, South Korea)            |
| 9.6  | 1                 | Bull eye level 32 mm                       | Taskar                                  |
| 9.7  | 1                 | Lithium Battery ICR 18650 x 3              | Pkcell (Shenzhen, Hong Kong, China)     |
| 9.8  | 1                 | Lithium battery x ICR 18650 x 1            | Pkcell (Shenzhen, Hong Kong, China)     |
| 9.9  | 2                 | Waterproof micro usb port                  | Cerrxian (China)                        |
| 9.10 | 3                 | USB to ttl connectors cp2102               | Izokee (China)                          |
| 9.11 | 1                 | Waterproof switch Round Rocker Switch Blue | Twidex (Suzhou, China)                  |
| 9.12 | 1                 | Raspberry pi zero w                        | Raspberry Pi Foundation (Cambridge, UK) |
| 9.13 | 1                 | USB HUB Zero - BH10128PSU                  | Makerspot                               |
| 9.14 | 1                 | Touch screen nextion NX3224T024            | Nextion (Shenzhen, Hong Kong, China)    |
| 9.15 | 1                 | Raspberry Pi Camera (G) 160°               | Waveshare (Shenzhen, Hong Kong, China)  |
| 9.16 | 1                 | Tfmini plus micro lidar                    | Benewake (Beijing, China)               |
| 9.17 | 1                 | Clock DS3231 RTC                           | Daoki (China)                           |
| 9.18 | 1                 | GPS Beitian BN 220                         | Beitian (Shenzhen, Hong Kong, China)    |
| 9.19 | 4                 | Hex socket head cap screw M5x0.8x20 mm     | Local Supplier                          |
| 9.20 | 4                 | Hex locking nut M5x0.8                     | Local Supplier                          |
| 9.21 | 4                 | Hex socket head cap screw M5x0.8x20 mm     | Local Supplier                          |

# One meter plus (1M+) A multifunctional open source sensor for bicycles based on raspberry pi.

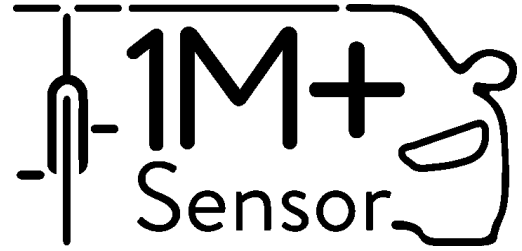

## Detailed list of products

| Item | Quantity | Name                                                | Manufacturer   |
|------|----------|-----------------------------------------------------|----------------|
| 9.22 | 2        | Hex socket head cap screw<br>M6x1.0x20 mm           | Local Supplier |
| 9.23 | 2        | Hex locking nut M6x1.0                              | Local Supplier |
| 9.24 | 9        | Hex socket head cap screw M3x0.5x 7 mm              | Local Supplier |
| 9.25 | 10       | Hex socket head cap screw M2x0.4x7 mm               | Local Supplier |
| 9.26 | 10       | Knurled Nut insert M2                               | Local Supplier |
| 9.27 | 9        | Knurled Nut insert M3                               | Local Supplier |
| 9.28 | 4        | Hex plastic standoff for raspberry pi M2.4x10mm+6mm | Makerspot      |
| 9.29 | 2        | Micro USB Type B Male Connector                     | Uxcell         |
| 9.30 | 1        | Standard USB Type A Male Connector                  | Biuzi          |
| 10   | Other    |                                                     |                |
| 10.1 | NA       | Solder                                              |                |
| 10.2 | NA       | 24-28 AWG wires                                     |                |
| 10.3 | NA       | Heat Shrink Tubing Cable                            |                |
| 10.4 | 1        | Accessories Hub Micro USB OTG 4 ports               | MakerSpot      |

NA : Not applicable

**Supplementary material for the article: One meter plus (1M+), a multifunctional open source sensor for bicycles based on raspberry pi.**

## **2. Plans**



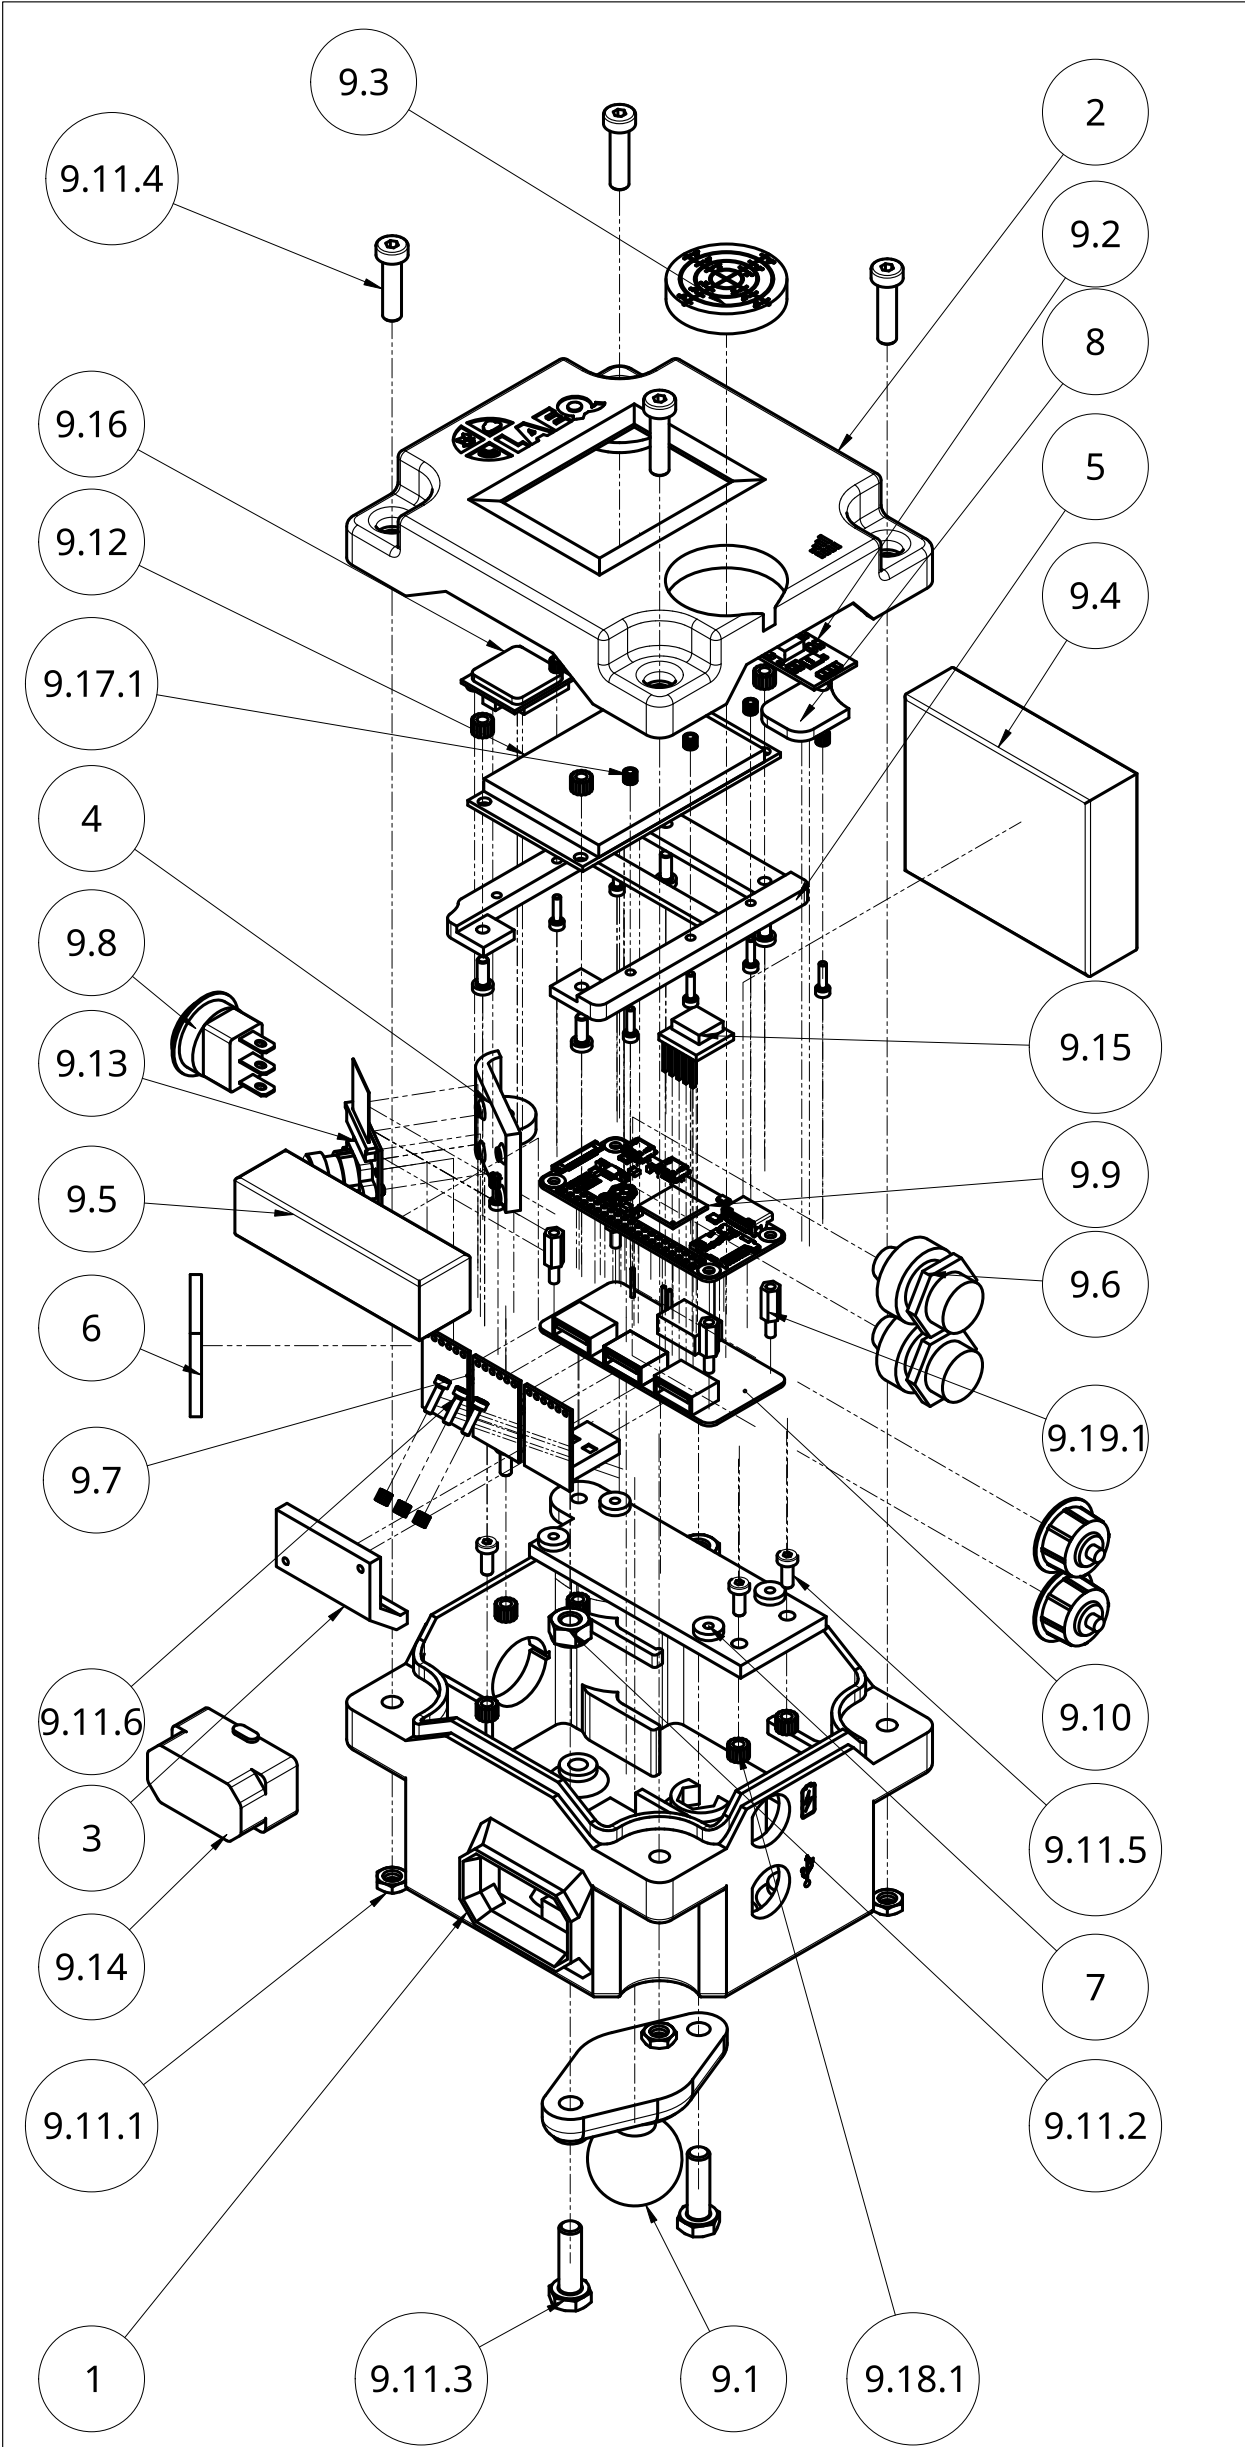

| Item   | Quantity | Name                                    |
|--------|----------|-----------------------------------------|
| 1      | 1        | Bottom case                             |
| 2      | 1        | Top cover                               |
| 3      | 1        | Distance sensor support                 |
| 4      | 1        | Camera support                          |
| 5      | 1        | Touch screen support                    |
| 6      | 1        | Acrylic cover                           |
| 7      | 1        | Raspberry pi support                    |
| 8      | 1        | Charger support                         |
| 9      | 1        | Standard products                       |
| 9.1    | 1        | RAM® ball support diamond               |
| 9.2    | 1        | HW-775 Charger                          |
| 9.3    | 1        | Bull eye level                          |
| 9.4    | 1        | Lithium Battery x 3                     |
| 9.5    | 1        | Lithium battery x 1                     |
| 9.6    | 1        | Waterproof micro usb port               |
| 9.7    | 1        | USB to ttl connectors                   |
| 9.8    | 1        | Waterproof switch                       |
| 9.9    | 1        | Raspberry pi zero w                     |
| 9.10   | 1        | USB HUB Zero                            |
| 9.11   | 1        | Nuts and screws                         |
| 9.11.1 | 4        | Hex thin nut grade A & B M5x0.8         |
| 9.11.2 | 2        | Hex nut style 2 grade A & B M6x1.0      |
| 9.11.3 | 2        | Hex head screw grade A & B M6x1.00 x 20 |
| 9.11.4 | 4        | Hex socket head cap screw M5x0.80 x 20  |
| 9.11.5 | 9        | Hex socket head cap screw M3x0.50 x 8   |
| 9.11.6 | 10       | Hex socket head cap screw M2x0.40 x 8   |
| 9.12   | 1        | Touch screen nextion                    |
| 9.13   | 1        | Raspberry Pi Camera (G) 160°            |
| 9.14   | 1        | Tfmini plus micro lidar                 |
| 9.15   | 1        | Clock DS3231 RTC                        |
| 9.16   | 1        | GPS Beitian BN 220                      |
| 9.17   | 1        | Knurled nut insert M2                   |
| 9.17.1 | 10       | Knurled Nut Insert M2                   |
| 9.18   | 1        | Knurled nut insert M3                   |
| 9.18.1 | 9        | Knurled Nut Insert M3                   |
| 9.19   | 1        | Hex Standoff M2.5 x 10 mm               |
| 9.19.1 | 4        | Hex standoff M2.5 x 10 + 6mm            |

|                                                           |  |          |              |            |                                                                                               |         |
|-----------------------------------------------------------|--|----------|--------------|------------|-----------------------------------------------------------------------------------------------|---------|
| UNLESS OTHERWISE SPECIFIED, DIMENSIONS ARE IN MILLIMETERS |  | NAME     | SIGNATURE    | DATE       | One metre plus (1M+): a multifunctional open source sensor for bicycles based on raspberry pi |         |
| Conception: Andres Henao carlosa.henao@inrs.ca            |  | DRAWN    | ANDRES HENAO | 2021-05-13 | TITLE<br>One metre plus<br>Bill of materials                                                  |         |
| Programming: Andres Henao carlosa.henao@inrs.ca           |  | CHECKED  |              |            |                                                                                               |         |
| David Maignan davidmaignan@gmail.com                      |  | APPROVED |              |            |                                                                                               |         |
| Supervisor: Philippe Apparicio philippe.apparicio@inrs.ca |  |          |              |            | SIZE                                                                                          | DWG NO. |
|                                                           |  | MATERIAL | FINISH       |            | SCALE                                                                                         | WEIGHT  |
|                                                           |  |          |              |            | 1:2                                                                                           | 1 of 10 |

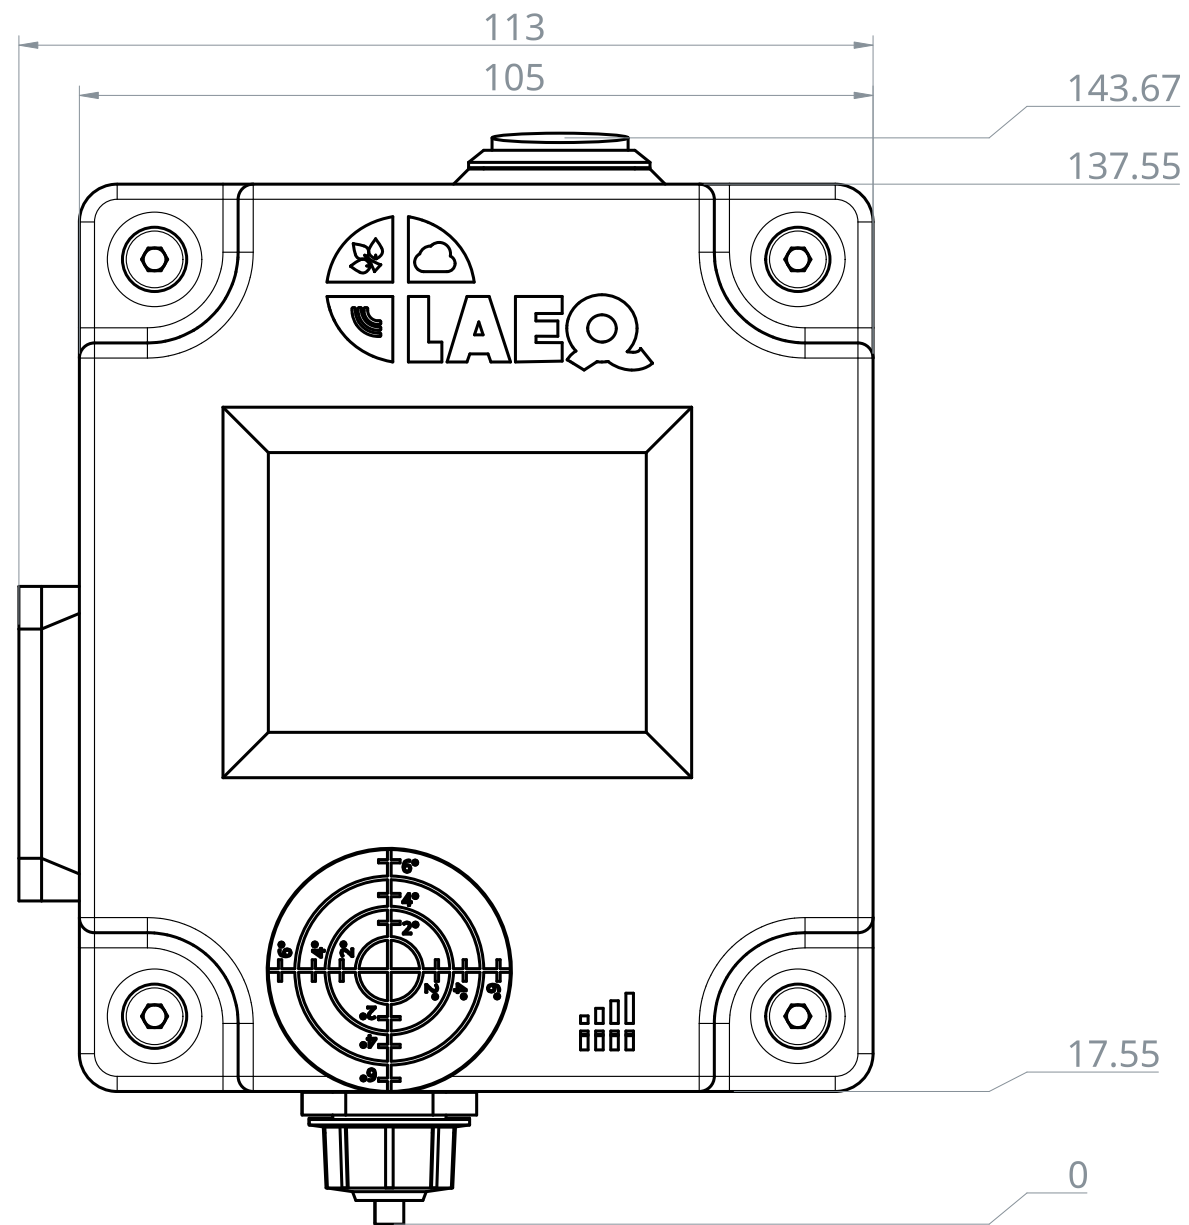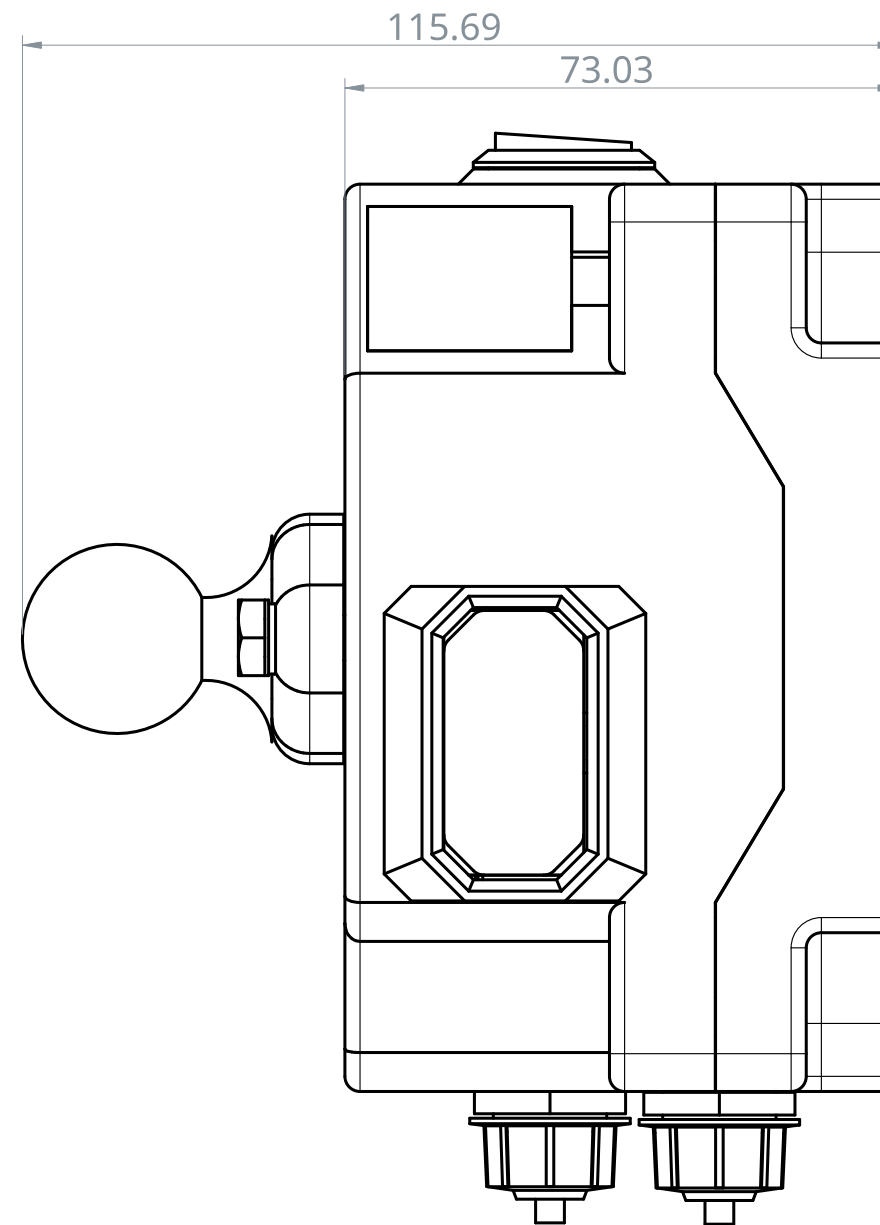

|                                                                                                                                                                                                                         |          |              |  |                                                                                                  |                                             |      |
|-------------------------------------------------------------------------------------------------------------------------------------------------------------------------------------------------------------------------|----------|--------------|--|--------------------------------------------------------------------------------------------------|---------------------------------------------|------|
| UNLESS OTHERWISE SPECIFIED,<br>DIMENSIONS ARE IN MILLIMETERS                                                                                                                                                            |          |              |  | One metre plus (1M+): a multifunctional open source<br>sensor for bicycles based on raspberry pi |                                             |      |
| Conception: Andres Henao<br>carlosa.henaof@inrs.ca<br>Programming:<br>Andres Henao<br>carlosa.henaof@inrs.ca<br>David Maignan<br>davidmaignan@gmail.com<br>Supervisor: Philippe Apparicio<br>philippe.apparicio@inrs.ca | DRAWN    | ANDRES HENAO |  | 2021-05-13                                                                                       | TITLE<br><b>One metre plus<br/>Assembly</b> |      |
|                                                                                                                                                                                                                         | CHECKED  |              |  |                                                                                                  |                                             |      |
|                                                                                                                                                                                                                         | APPROVED |              |  |                                                                                                  |                                             |      |
|                                                                                                                                                                                                                         |          |              |  |                                                                                                  |                                             |      |
| MATERIAL                                                                                                                                                                                                                |          | FINISH       |  | SIZE<br><b>A3</b>                                                                                | DWG NO.                                     | REV. |
| SCALE<br>1:1                                                                                                                                                                                                            |          | WEIGHT       |  | SHEET<br>2 of 10                                                                                 |                                             |      |

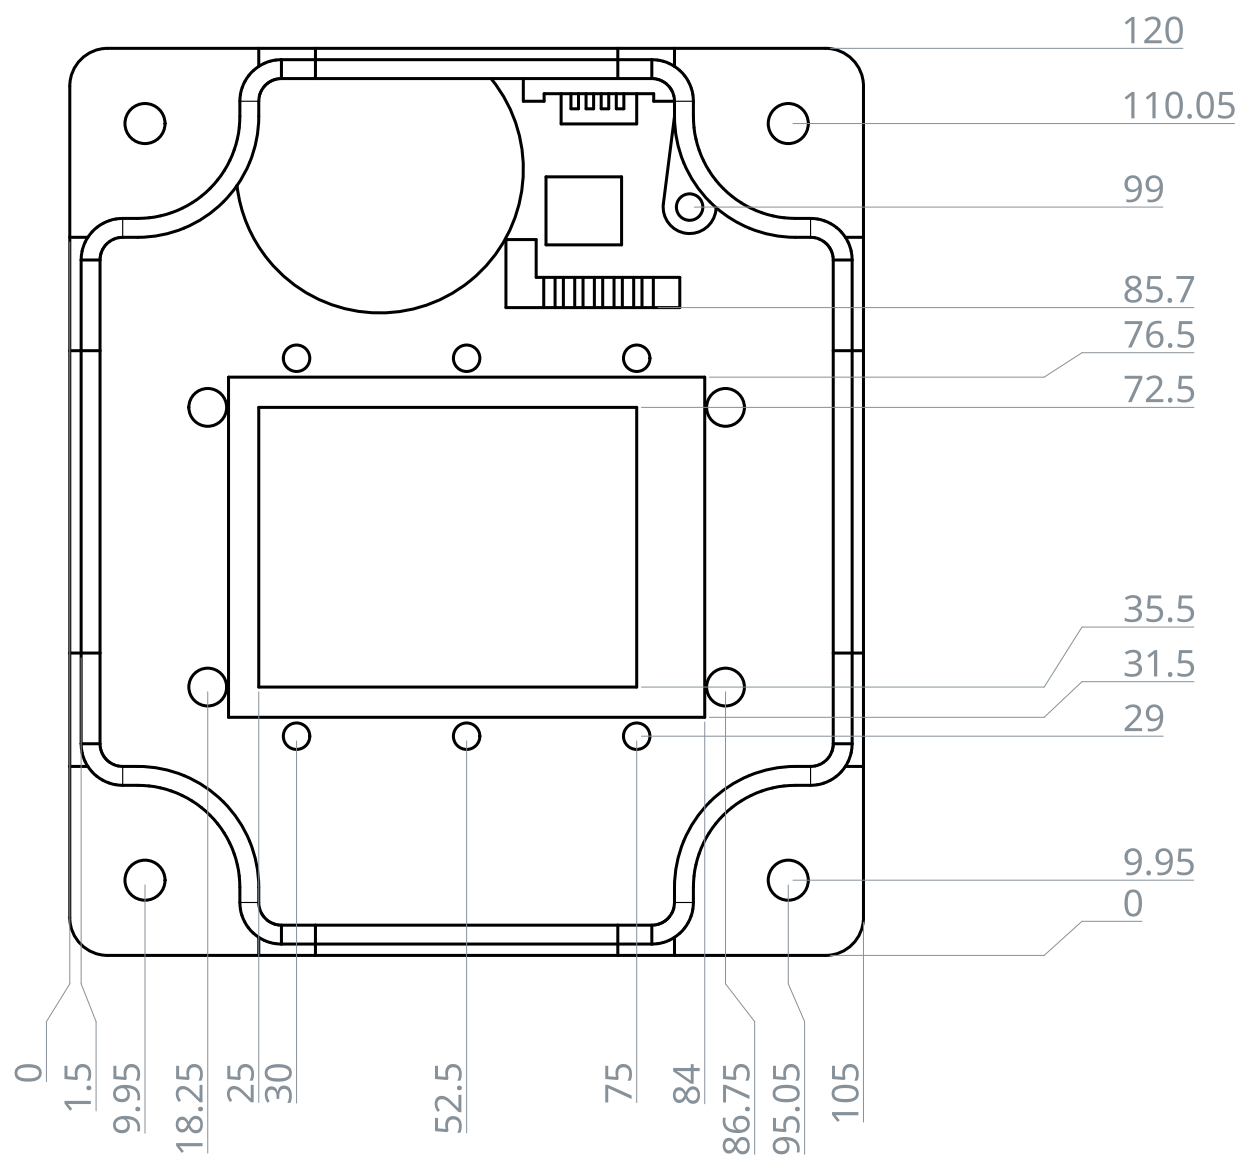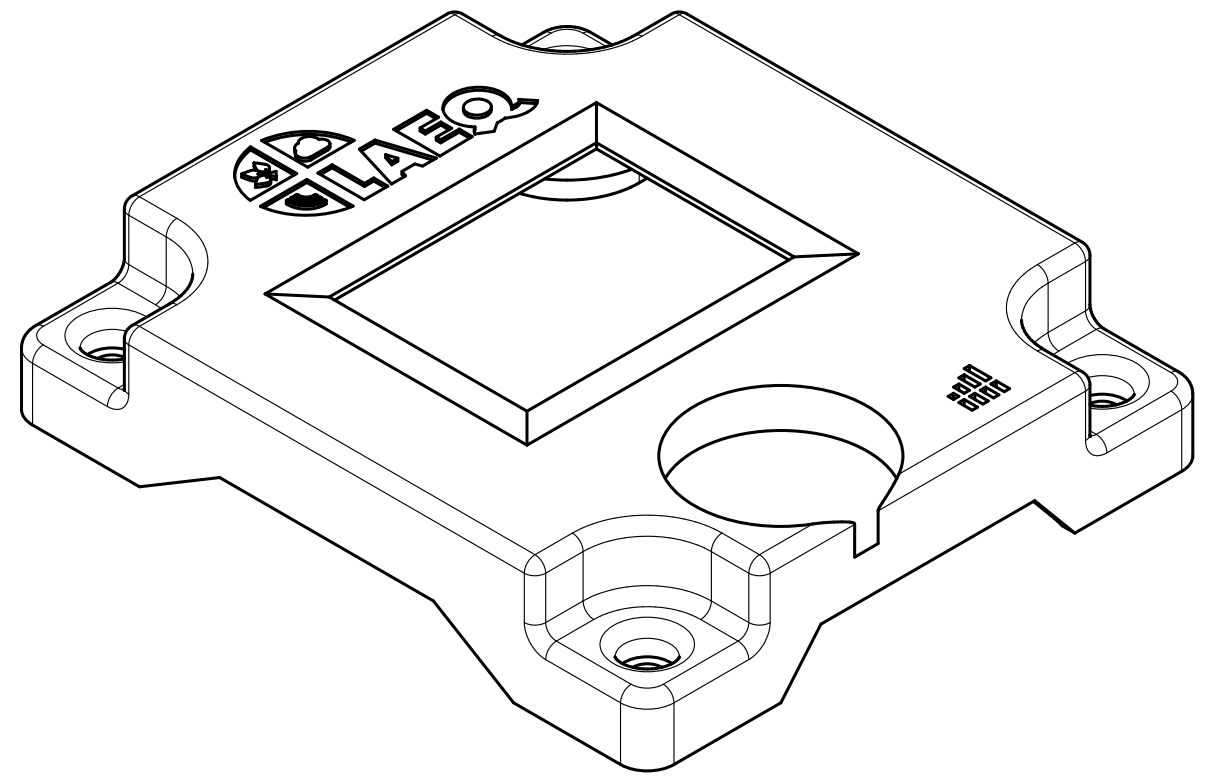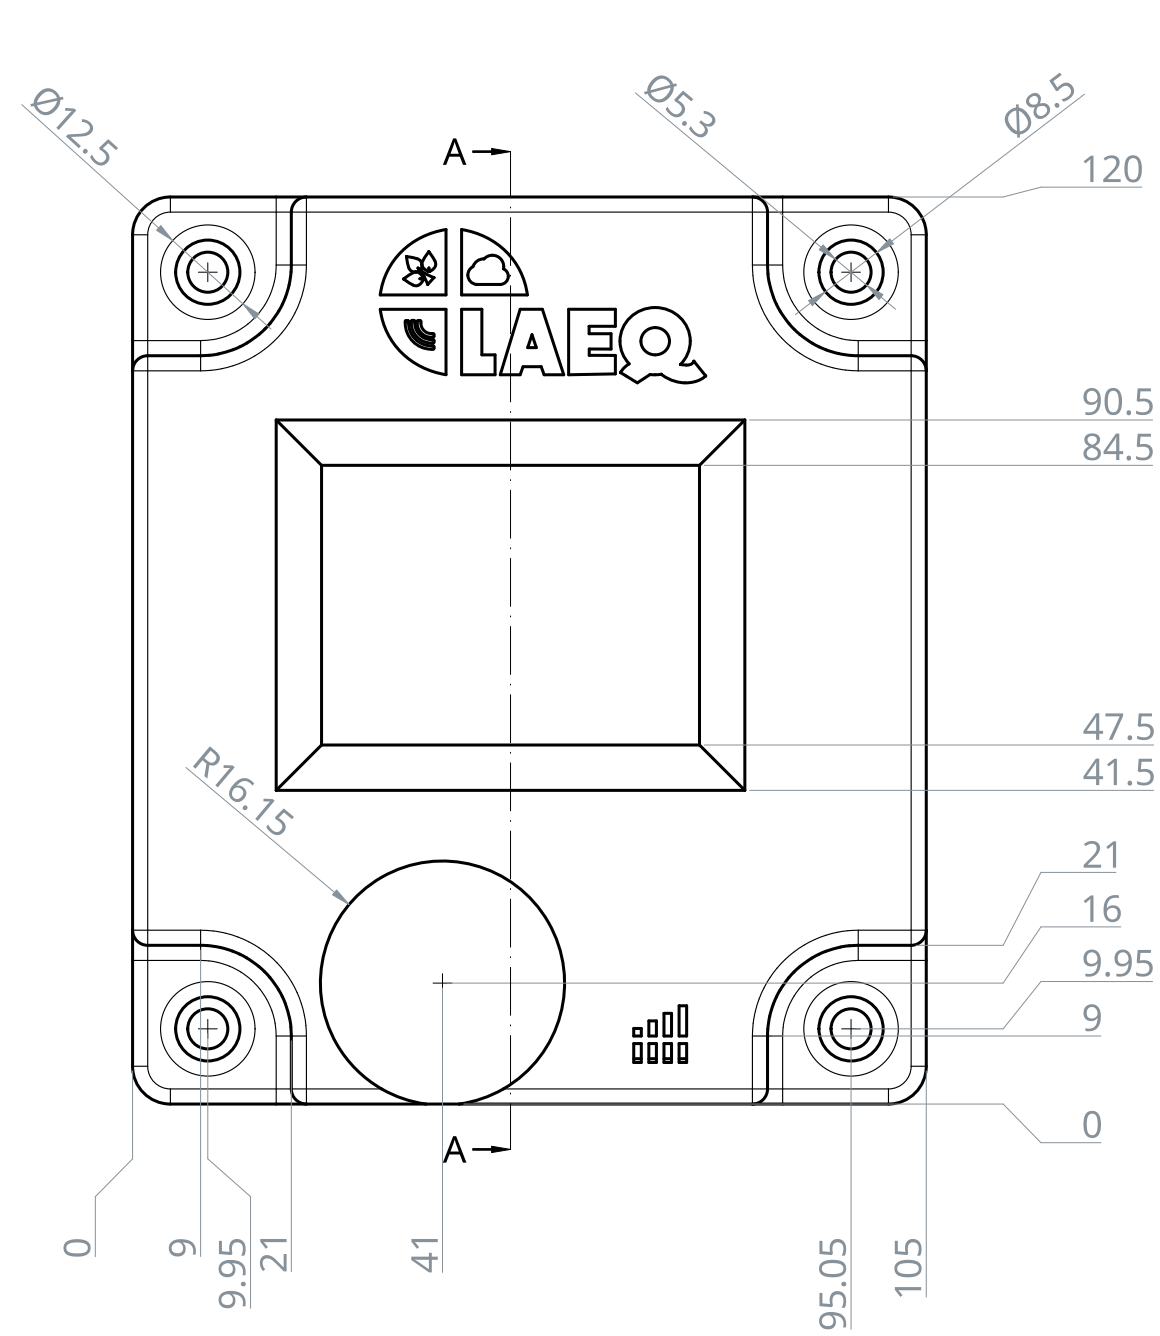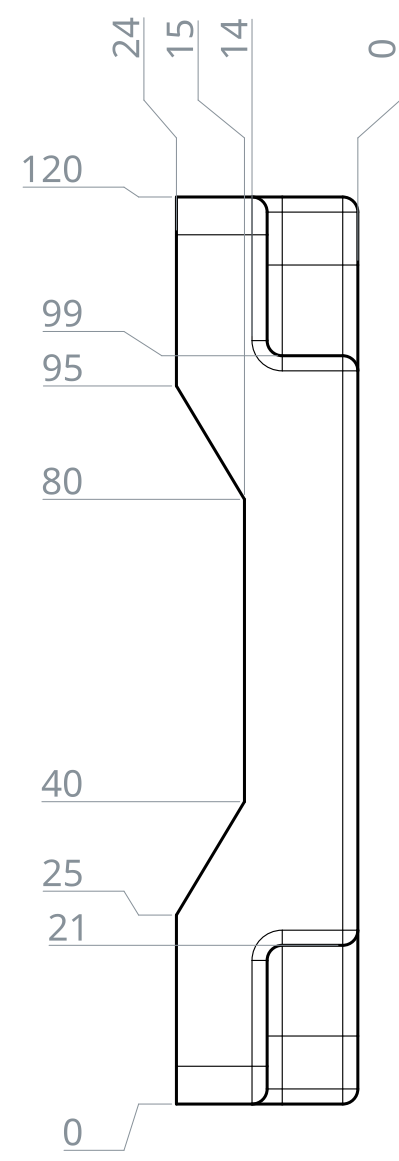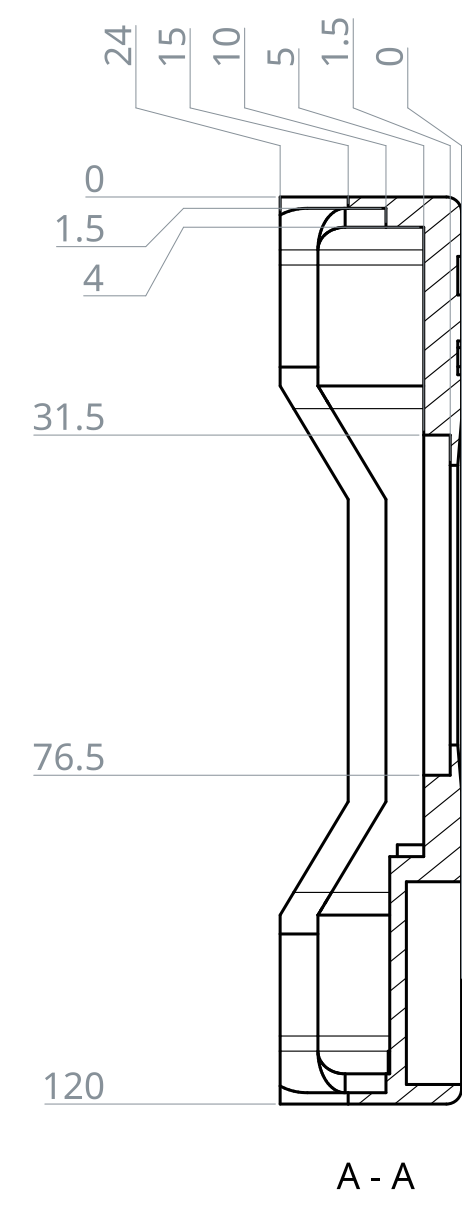

|                                                                                                                                                                                                                       |          |              |  |                                                                                               |                                      |      |
|-----------------------------------------------------------------------------------------------------------------------------------------------------------------------------------------------------------------------|----------|--------------|--|-----------------------------------------------------------------------------------------------|--------------------------------------|------|
| UNLESS OTHERWISE SPECIFIED, DIMENSIONS ARE IN MILLIMETERS                                                                                                                                                             |          |              |  | One metre plus (1M+): a multifunctional open source sensor for bicycles based on raspberry pi |                                      |      |
| Conception: Andres Henao<br>carlosa.henaof@inrs.ca<br>Programming:<br>Andres Henao<br>carlosa.henaof@inrs.ca<br>David Maignan<br>davidmaignan@gmail.com<br>Supervisor: Philippe Apparcio<br>philippe.apparcio@inrs.ca | DRAWN    | ANDRES HENAO |  | 2021-05-13                                                                                    | TITLE<br>One metre plus<br>Top cover |      |
|                                                                                                                                                                                                                       | CHECKED  |              |  |                                                                                               |                                      |      |
|                                                                                                                                                                                                                       | APPROVED |              |  |                                                                                               |                                      |      |
|                                                                                                                                                                                                                       |          |              |  |                                                                                               |                                      |      |
| MATERIAL                                                                                                                                                                                                              |          | FINISH       |  | SIZE                                                                                          | DWG NO.                              | REV. |
| SCALE 1:1                                                                                                                                                                                                             |          | WEIGHT       |  | SHEET 3 of 10                                                                                 |                                      |      |

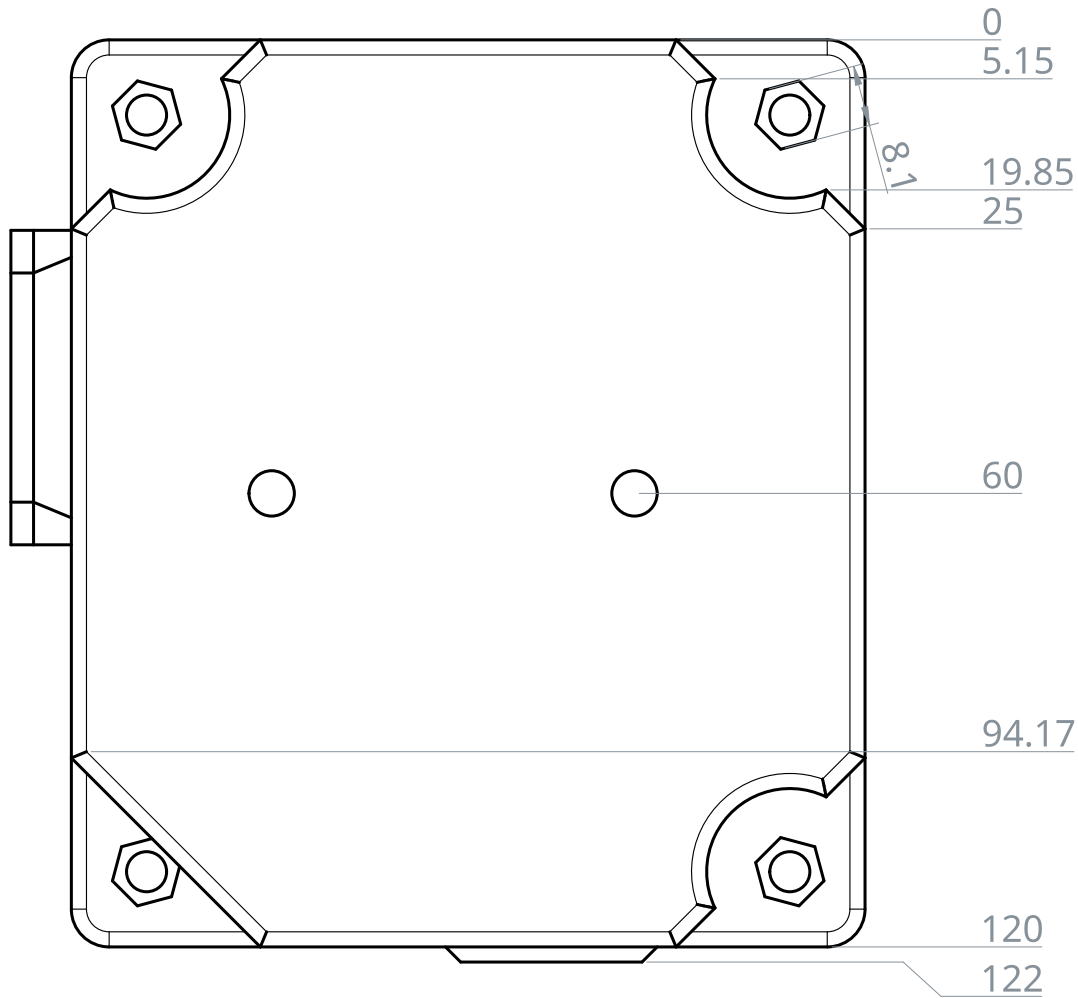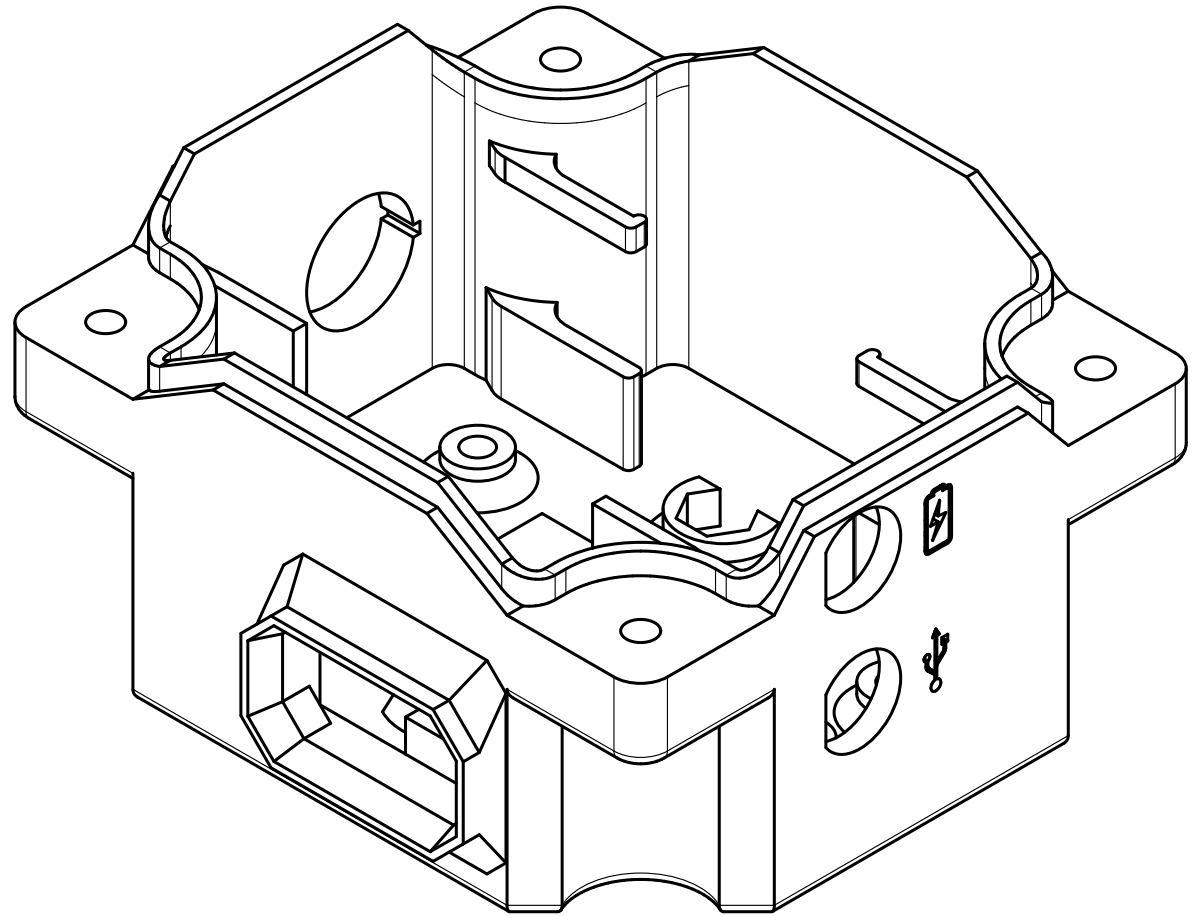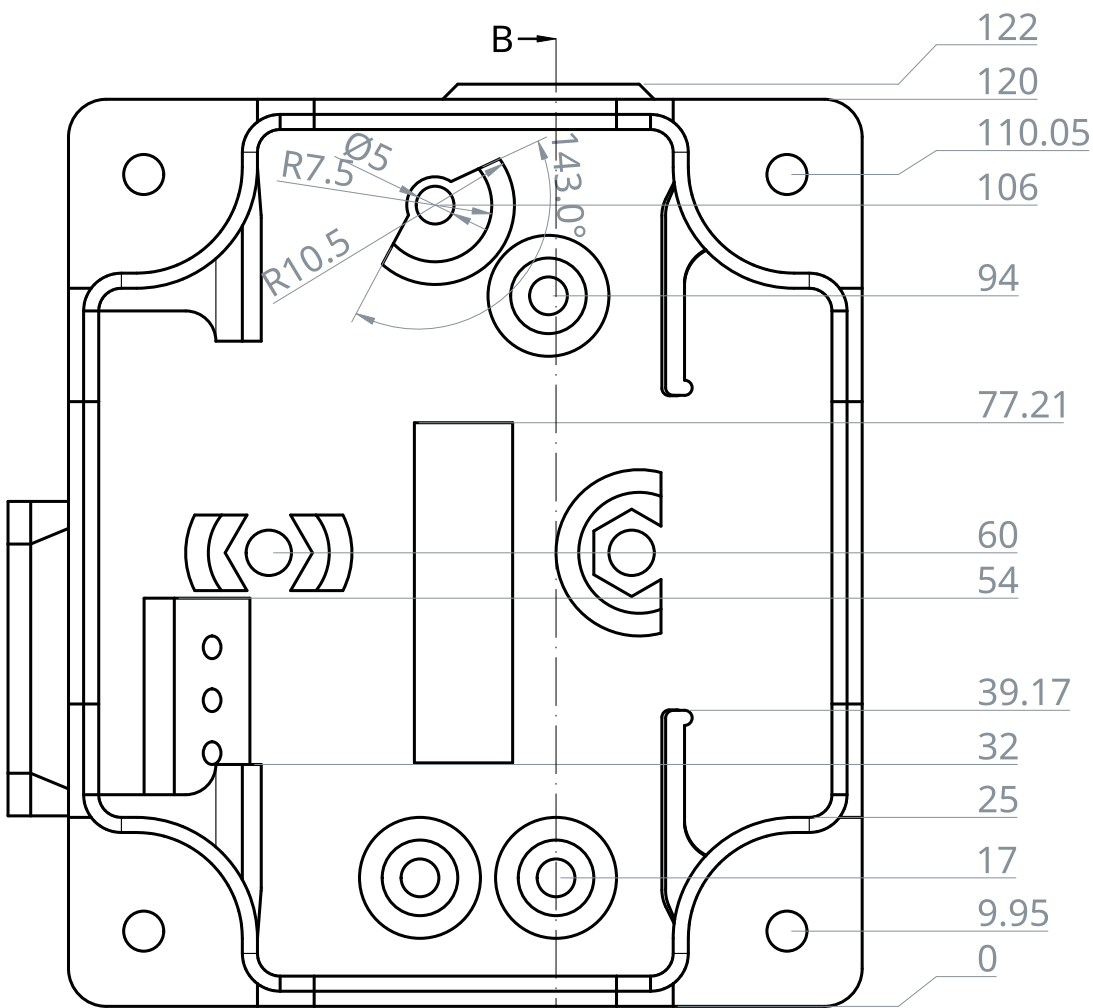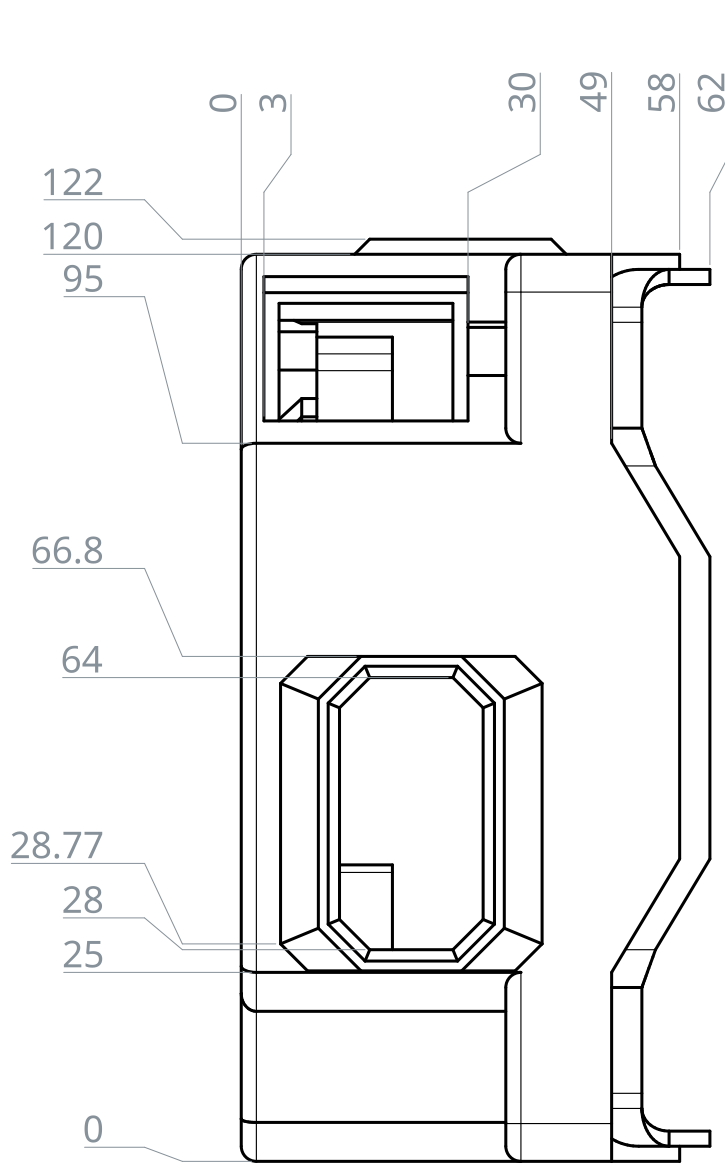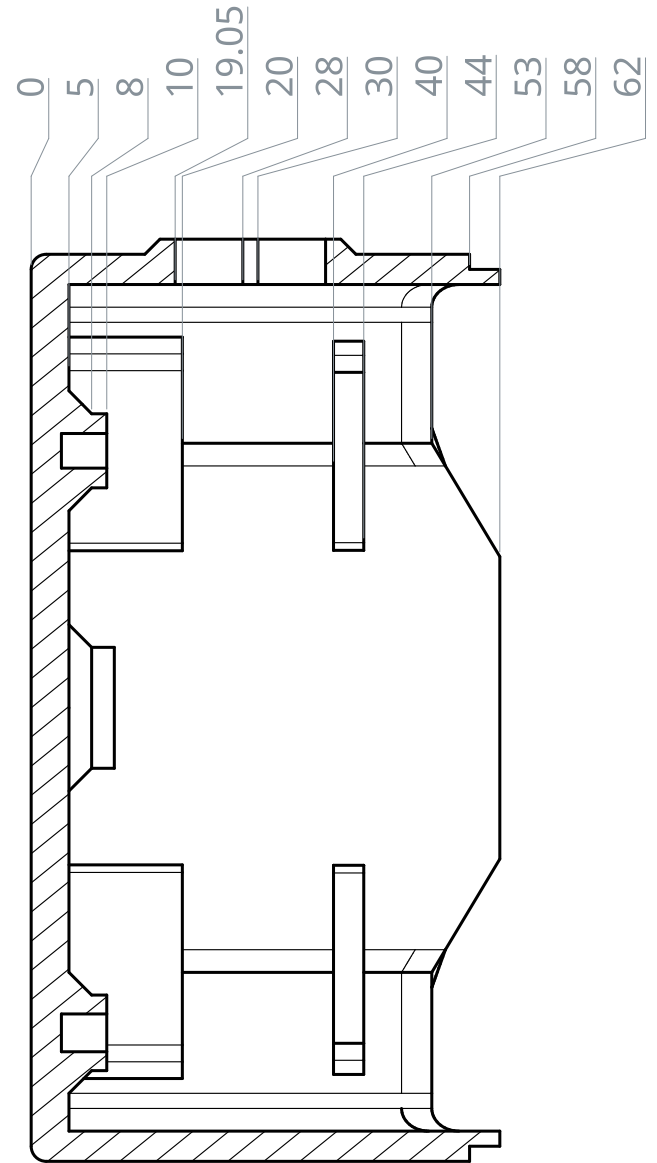

B - B

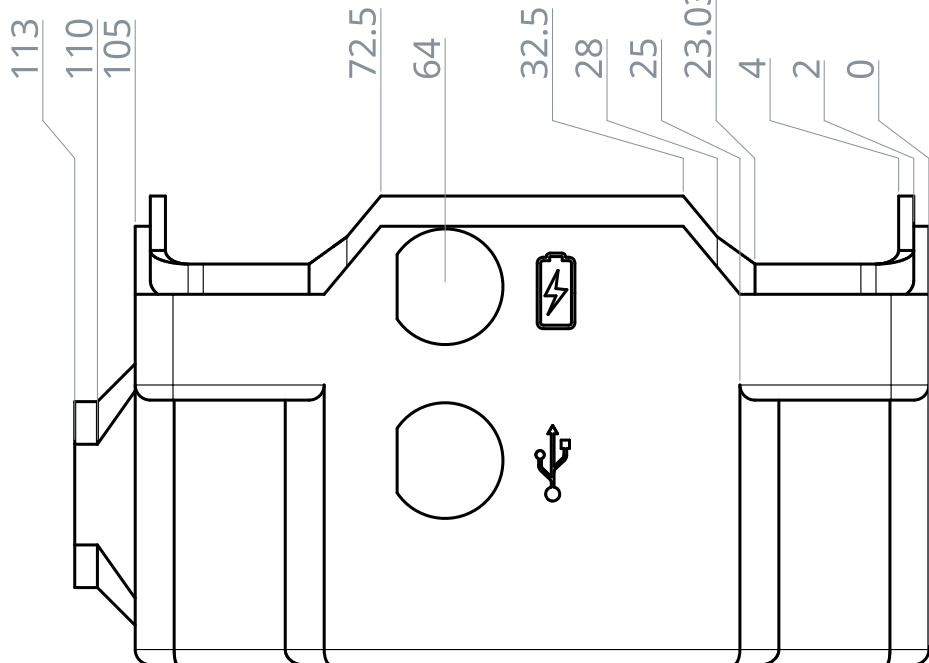

|                                                              |  |          |              |               |                                                                                                  |      |
|--------------------------------------------------------------|--|----------|--------------|---------------|--------------------------------------------------------------------------------------------------|------|
| UNLESS OTHERWISE SPECIFIED,<br>DIMENSIONS ARE IN MILLIMETERS |  | NAME     | SIGNATURE    | DATE          | One metre plus (1M+): a multifunctional open source<br>sensor for bicycles based on raspberry pi |      |
| Conception: Andres Henao<br>carlosa.henaof@inrs.ca           |  | DRAWN    | ANDRES HENAO | 2021-05-13    | TITLE<br><br><b>One metre plus<br/>Bottom Case</b>                                               |      |
| Programming:<br>Andres Henao<br>carlosa.henaof@inrs.ca       |  | CHECKED  |              |               |                                                                                                  |      |
| David Maignan<br>davidmaignan@gmail.com                      |  | APPROVED |              |               |                                                                                                  |      |
| Supervisor: Philippe Apparicio<br>philippe.apparicio@inrs.ca |  |          |              |               |                                                                                                  |      |
| MATERIAL                                                     |  | FINISH   |              | SIZE          | DWG NO.                                                                                          | REV. |
| SCALE 1:1                                                    |  | WEIGHT   |              | SHEET 4 of 10 |                                                                                                  |      |



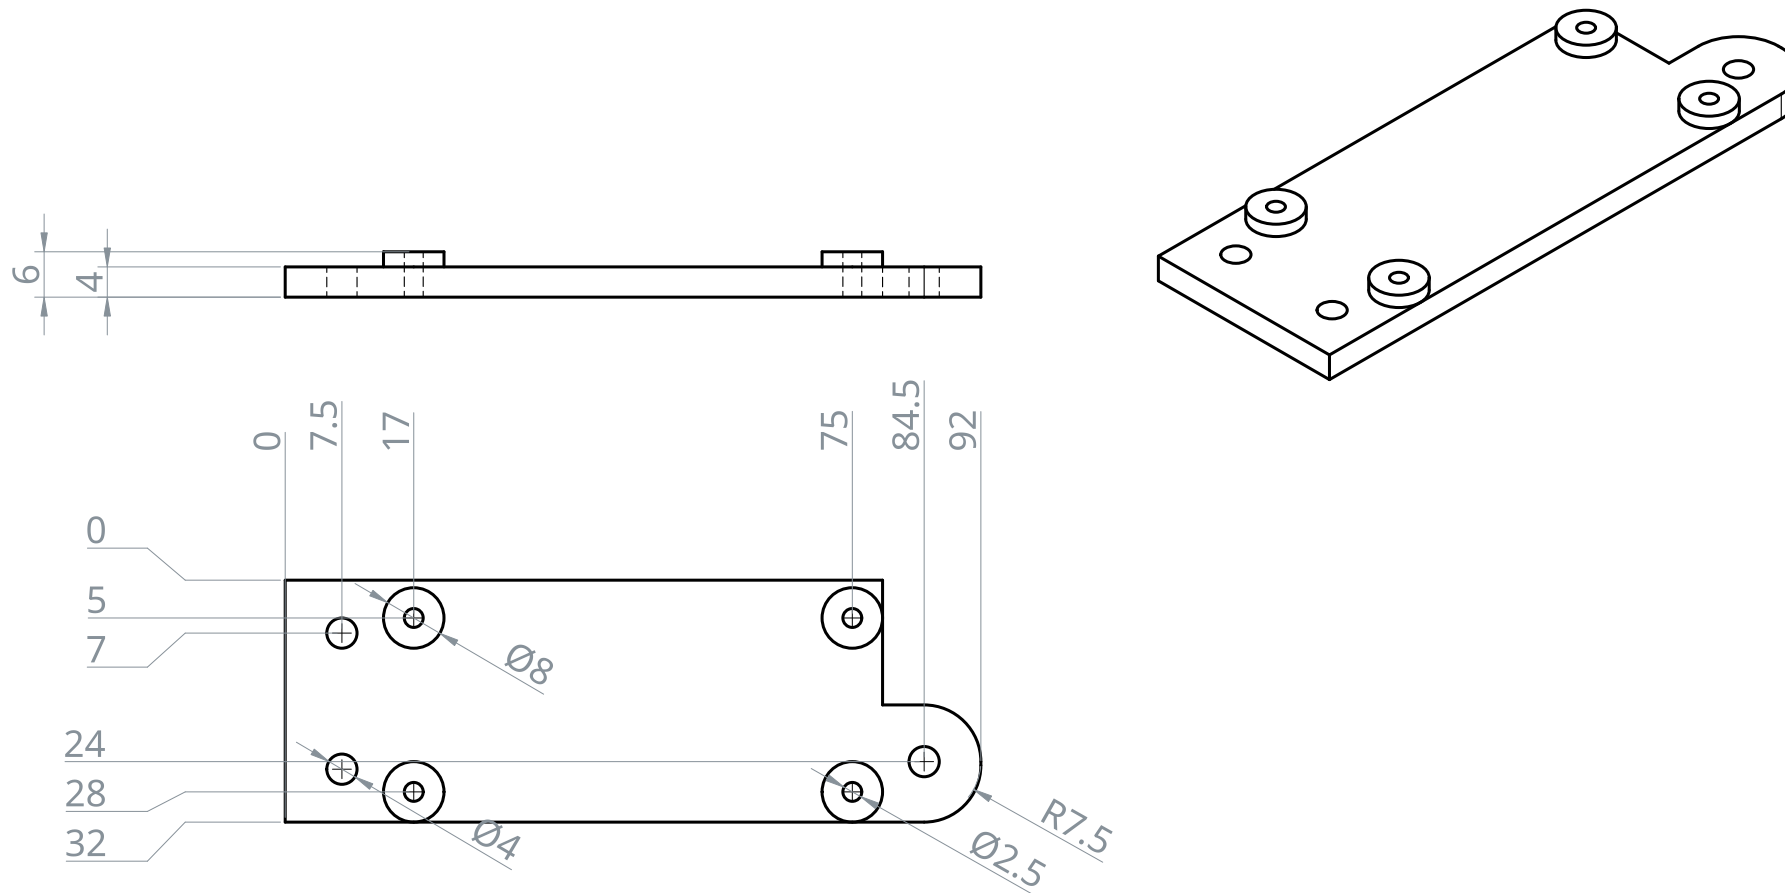

|                                                              |  |          |              |            |                                                                                                  |         |
|--------------------------------------------------------------|--|----------|--------------|------------|--------------------------------------------------------------------------------------------------|---------|
| UNLESS OTHERWISE SPECIFIED,<br>DIMENSIONS ARE IN MILLIMETERS |  | NAME     | SIGNATURE    | DATE       | One metre plus (1M+): a multifunctional open source<br>sensor for bicycles based on raspberry pi |         |
| Conception: Andres Henao<br>carlosa.henaof@inrs.ca           |  | DRAWN    | ANDRES HENAO | 2021-05-13 | <div> <div>TITLE</div> <div>One metre plus<br/>Raspberry pi support</div> </div>                 |         |
| Programming:<br>Andres Henao<br>carlosa.henaof@inrs.ca       |  | CHECKED  |              |            |                                                                                                  |         |
| David Malignan<br>davidmalignan@gmail.com                    |  | APPROVED |              |            |                                                                                                  |         |
| Supervisor: Philippe Apparicio<br>philippe.apparicio@inrs.ca |  |          |              |            |                                                                                                  |         |
| <div> <div></div> <div></div> </div>                         |  | MATERIAL | FINISH       |            | SIZE<br><b>A4</b>                                                                                | DWG NO. |
|                                                              |  |          |              |            | SCALE<br>1:1                                                                                     | WEIGHT  |
|                                                              |  |          |              |            | SHEET                                                                                            | 5 of 10 |

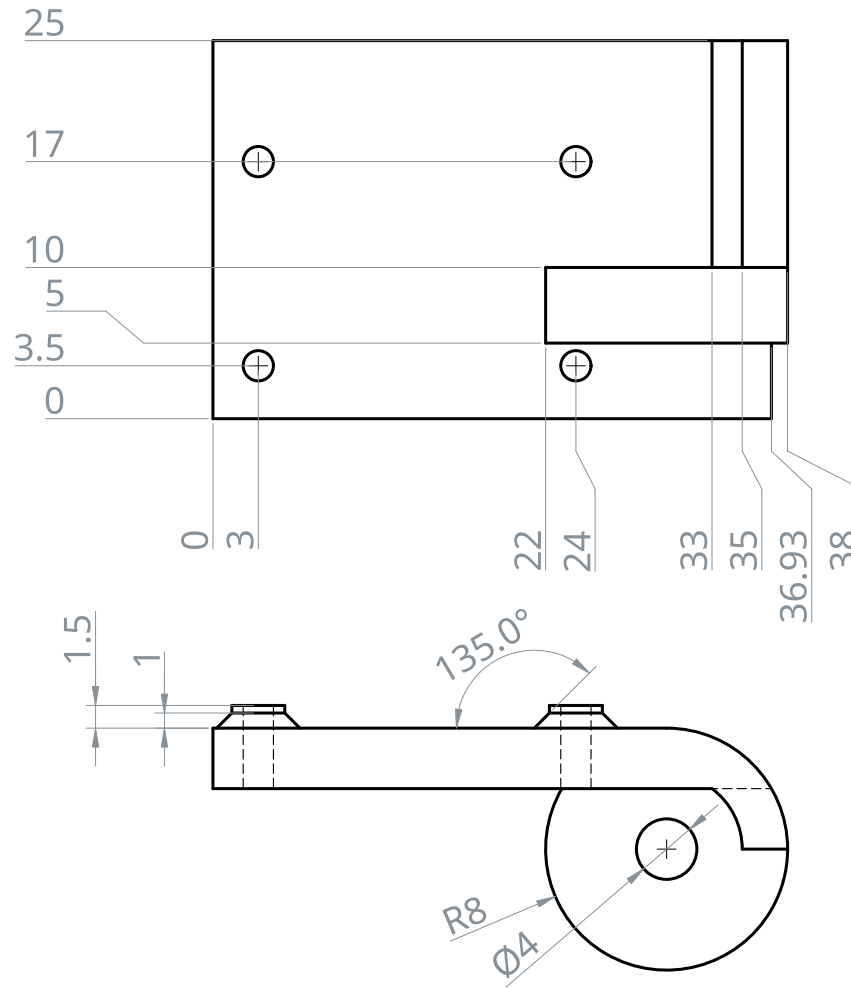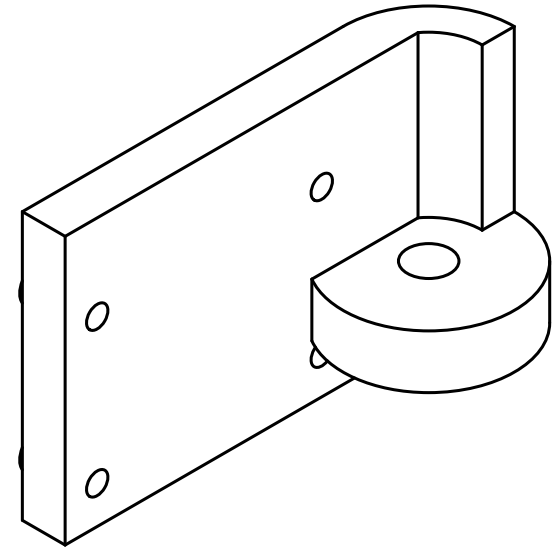

|                                                                                                                                                                                                                           |  |          |              |                   |                                                                                                  |                  |
|---------------------------------------------------------------------------------------------------------------------------------------------------------------------------------------------------------------------------|--|----------|--------------|-------------------|--------------------------------------------------------------------------------------------------|------------------|
| UNLESS OTHERWISE SPECIFIED,<br>DIMENSIONS ARE IN MILLIMETERS                                                                                                                                                              |  | NAME     | SIGNATURE    | DATE              | One metre plus (1M+): a multifunctional open source<br>sensor for bicycles based on raspberry pi |                  |
| Conception: Andres Henao<br>carlosa.henaof@inrs.ca<br>Programming:<br>Andres Henao<br>carlosa.henaof@inrs.ca<br>David Malignan<br>davidmalignan@gmail.com<br>Supervisor: Philippe Apparicio<br>philippe.apparicio@inrs.ca |  | DRAWN    | ANDRES HENAO | 2021-05-13        | TITLE<br><h2>One metre plus<br/>Camera support</h2>                                              |                  |
|                                                                                                                                                                                                                           |  | CHECKED  |              |                   |                                                                                                  |                  |
|                                                                                                                                                                                                                           |  | APPROVED |              |                   |                                                                                                  |                  |
|                                                                                                                                                                                                                           |  |          |              |                   |                                                                                                  |                  |
| MATERIAL                                                                                                                                                                                                                  |  | FINISH   |              | SIZE<br><b>A4</b> | DWG NO.                                                                                          | REV.             |
|                                                                                                                                      |  |          |              | SCALE<br>2:1      | WEIGHT                                                                                           | SHEET<br>6 of 10 |

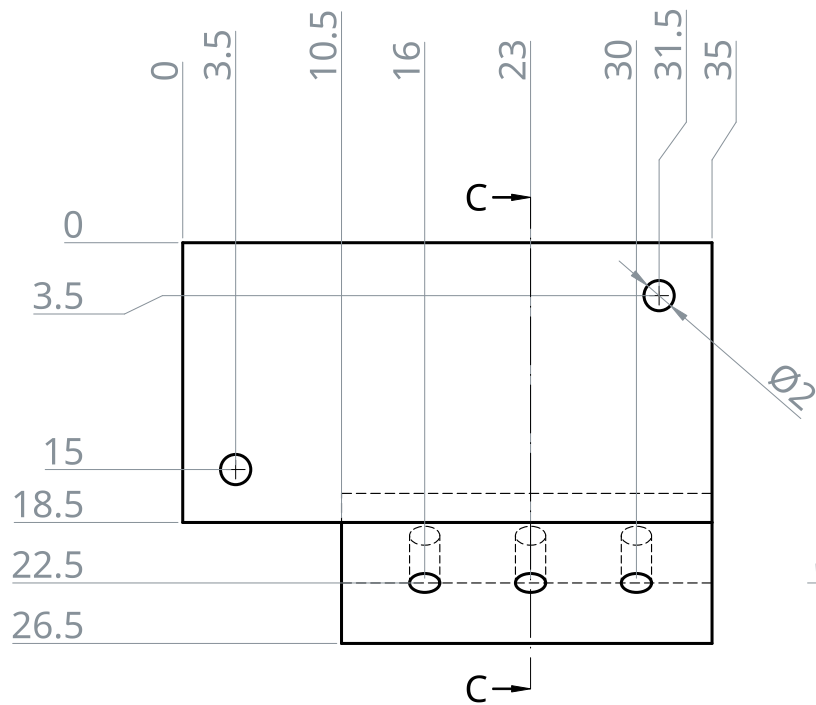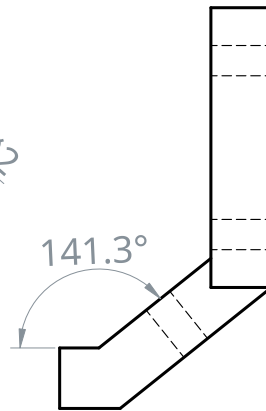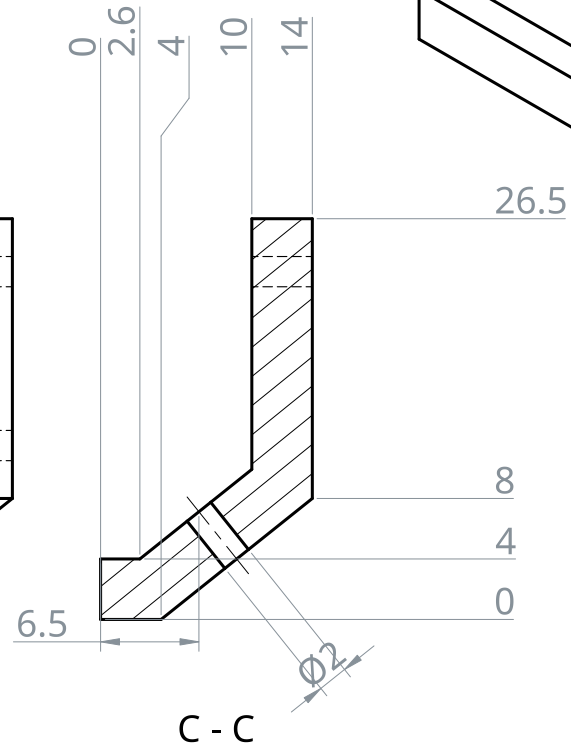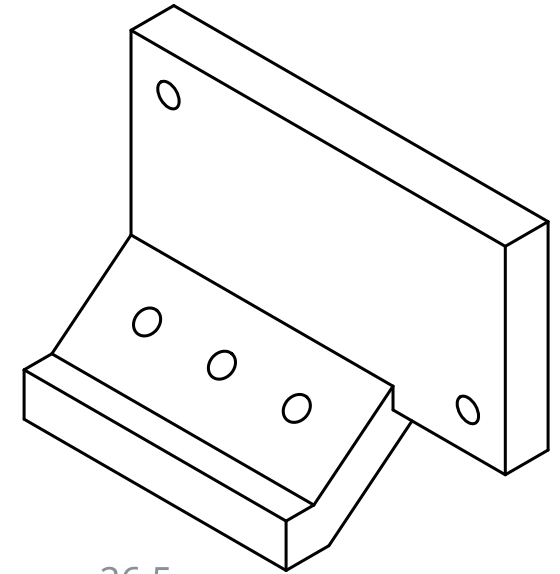

|                                                              |  |          |              |                   |                                                                                                  |      |
|--------------------------------------------------------------|--|----------|--------------|-------------------|--------------------------------------------------------------------------------------------------|------|
| UNLESS OTHERWISE SPECIFIED,<br>DIMENSIONS ARE IN MILLIMETERS |  | NAME     | SIGNATURE    | DATE              | One metre plus (1M+): a multifunctional open source<br>sensor for bicycles based on raspberry pi |      |
| Conception: Andres Henao<br>carlosa.henaof@inrs.ca           |  | DRAWN    | ANDRES HENAO | 2021-05-13        | <div> <div>TITLE</div> <div>One metre plus</div> <div>Distance sensor support</div> </div>       |      |
| Programming:<br>Andres Henao<br>carlosa.henaof@inrs.ca       |  | CHECKED  |              |                   |                                                                                                  |      |
| David Malignan<br>davidmalignan@gmail.com                    |  | APPROVED |              |                   |                                                                                                  |      |
| Supervisor: Philippe Apparicio<br>philippe.apparicio@inrs.ca |  |          |              |                   |                                                                                                  |      |
| MATERIAL                                                     |  | FINISH   |              | SIZE<br><b>A4</b> | DWG NO.                                                                                          | REV. |
| SCALE<br>2:1                                                 |  | WEIGHT   |              | SHEET<br>7 of 10  |                                                                                                  |      |

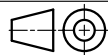

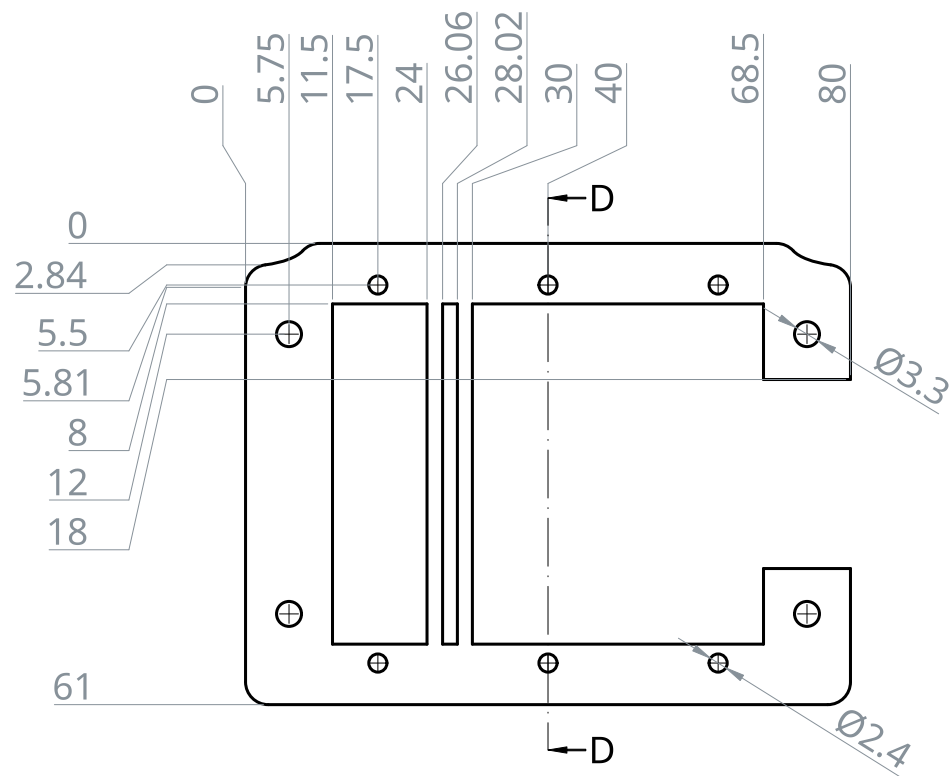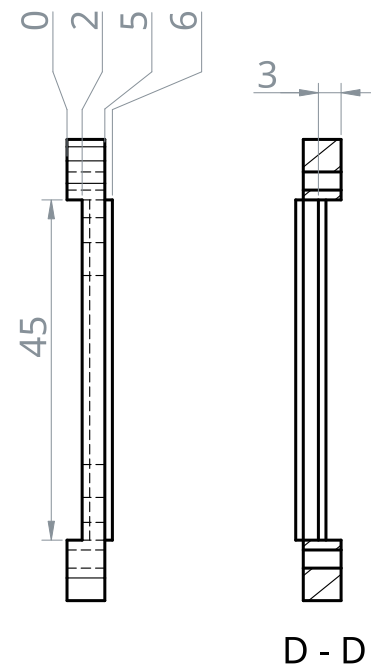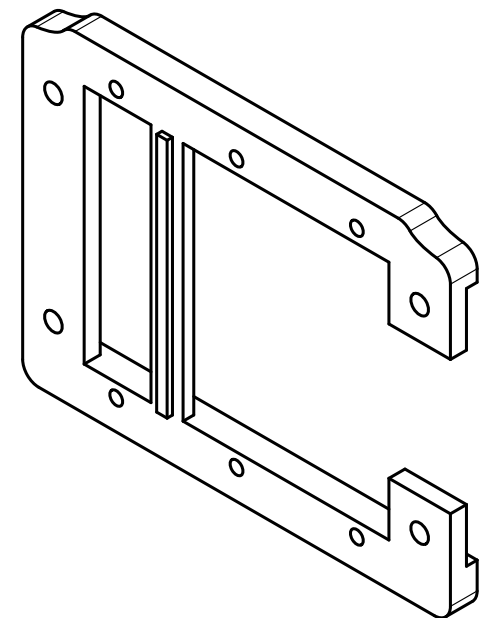

|                                                                                                                                                                                                                           |  |          |              |                     |                                                                                                  |                         |
|---------------------------------------------------------------------------------------------------------------------------------------------------------------------------------------------------------------------------|--|----------|--------------|---------------------|--------------------------------------------------------------------------------------------------|-------------------------|
| UNLESS OTHERWISE SPECIFIED,<br>DIMENSIONS ARE IN MILLIMETERS                                                                                                                                                              |  | NAME     | SIGNATURE    | DATE                | One metre plus (1M+): a multifunctional open source<br>sensor for bicycles based on raspberry pi |                         |
| Conception: Andres Henao<br>carlosa.henaof@inrs.ca<br>Programming:<br>Andres Henao<br>carlosa.henaof@inrs.ca<br>David Malignan<br>davidmalignan@gmail.com<br>Supervisor: Philippe Apparicio<br>philippe.apparicio@inrs.ca |  | DRAWN    | ANDRES HENAO | 2021-05-13          | <div> <div>TITLE</div> <div>One metre plus</div> <div>Touch screen support</div> </div>          |                         |
|                                                                                                                                                                                                                           |  | CHECKED  |              |                     |                                                                                                  |                         |
|                                                                                                                                                                                                                           |  | APPROVED |              |                     |                                                                                                  |                         |
|                                                                                                                                                                                                                           |  |          |              |                     |                                                                                                  |                         |
| MATERIAL                                                                                                                                                                                                                  |  | FINISH   |              | SIZE<br><b>A4</b>   | DWG NO.                                                                                          | REV.                    |
|                                                                                                                                                                                                                           |  |          |              | SCALE<br><b>1:1</b> | WEIGHT                                                                                           | SHEET<br><b>8 of 10</b> |

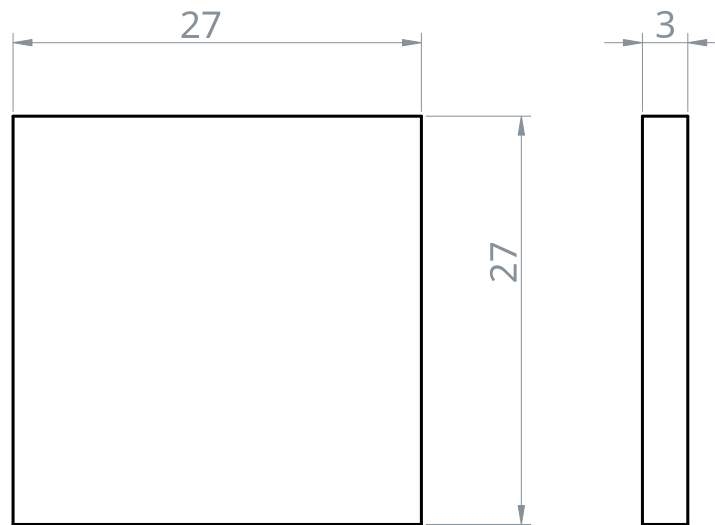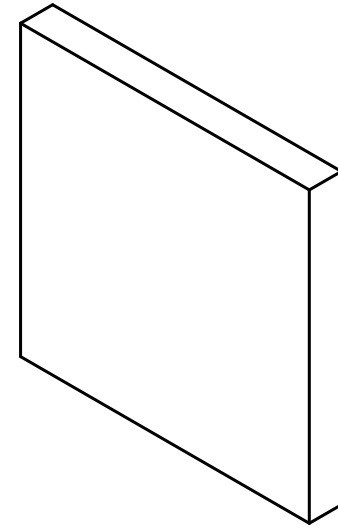

|                                                                                                                                                                                                                           |          |              |           |                     |                                                                                                  |                         |  |
|---------------------------------------------------------------------------------------------------------------------------------------------------------------------------------------------------------------------------|----------|--------------|-----------|---------------------|--------------------------------------------------------------------------------------------------|-------------------------|--|
| UNLESS OTHERWISE SPECIFIED,<br>DIMENSIONS ARE IN MILLIMETERS                                                                                                                                                              |          | NAME         | SIGNATURE | DATE                | One metre plus (1M+): a multifunctional open source<br>sensor for bicycles based on raspberry pi |                         |  |
| Conception: Andres Henao<br>carlosa.henaof@inrs.ca<br>Programming:<br>Andres Henao<br>carlosa.henaof@inrs.ca<br>David Malignan<br>davidmalignan@gmail.com<br>Supervisor: Philippe Apparicio<br>philippe.apparicio@inrs.ca | DRAWN    | ANDRES HENAO |           | 2021-05-13          | TITLE<br><h1>One metre plus<br/>Acrylic cover</h1>                                               |                         |  |
|                                                                                                                                                                                                                           | CHECKED  |              |           |                     |                                                                                                  |                         |  |
|                                                                                                                                                                                                                           | APPROVED |              |           |                     |                                                                                                  |                         |  |
|                                                                                                                                                                                                                           |          |              |           |                     |                                                                                                  |                         |  |
| MATERIAL                                                                                                                                                                                                                  |          | FINISH       |           | SIZE<br><b>A4</b>   | DWG NO.                                                                                          | REV.                    |  |
|                                                                                                                                                                                                                           |          |              |           | SCALE<br><b>2:1</b> | WEIGHT                                                                                           | SHEET<br><b>9 of 10</b> |  |

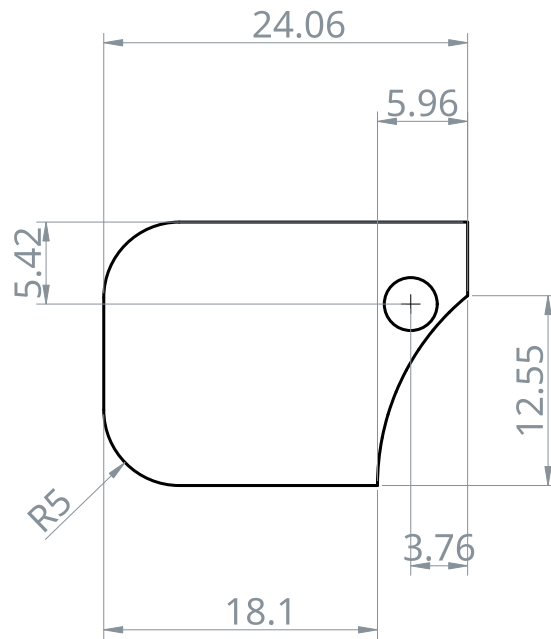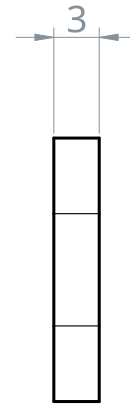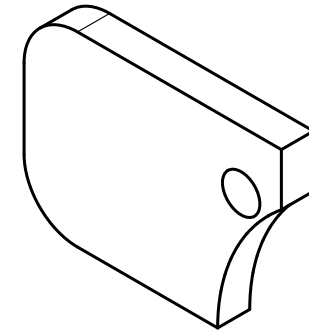

|                                                                                                                                                                                                                           |          |              |           |                     |                                                                                                  |                          |
|---------------------------------------------------------------------------------------------------------------------------------------------------------------------------------------------------------------------------|----------|--------------|-----------|---------------------|--------------------------------------------------------------------------------------------------|--------------------------|
| UNLESS OTHERWISE SPECIFIED,<br>DIMENSIONS ARE IN MILLIMETERS                                                                                                                                                              |          | NAME         | SIGNATURE | DATE                | One metre plus (1M+): a multifunctional open source<br>sensor for bicycles based on raspberry pi |                          |
| Conception: Andres Henao<br>carlosa.henaof@inrs.ca<br>Programming:<br>Andres Henao<br>carlosa.henaof@inrs.ca<br>David Malignan<br>davidmalignan@gmail.com<br>Supervisor: Philippe Apparicio<br>philippe.apparicio@inrs.ca | DRAWN    | ANDRES HENAO |           | 2021-05-13          | TITLE<br><h2>One metre plus<br/>Acrylic cover</h2>                                               |                          |
|                                                                                                                                                                                                                           | CHECKED  |              |           |                     |                                                                                                  |                          |
|                                                                                                                                                                                                                           | APPROVED |              |           |                     |                                                                                                  |                          |
|                                                                                                                                                                                                                           |          |              |           |                     |                                                                                                  |                          |
| MATERIAL                                                                                                                                                                                                                  |          | FINISH       |           | SIZE<br><b>A4</b>   | DWG NO.                                                                                          | REV.                     |
|                                                                                                                                                                                                                           |          |              |           | SCALE<br><b>2:1</b> | WEIGHT                                                                                           | SHEET<br><b>10 of 10</b> |

**Supplementary material for the article: One meter plus (1M+), a multifunctional open source sensor for bicycles based on raspberry pi.**

### **3. Connection diagram**

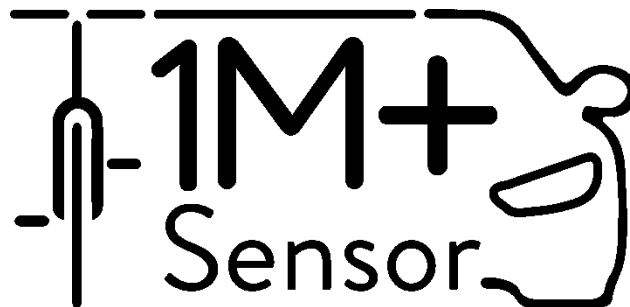

# One meter plus (1M+) A multifunctional open source sensor for bicycles based on raspberry pi. Connection diagram

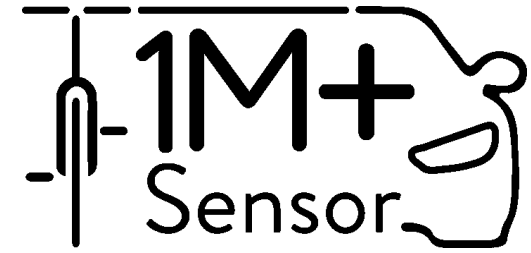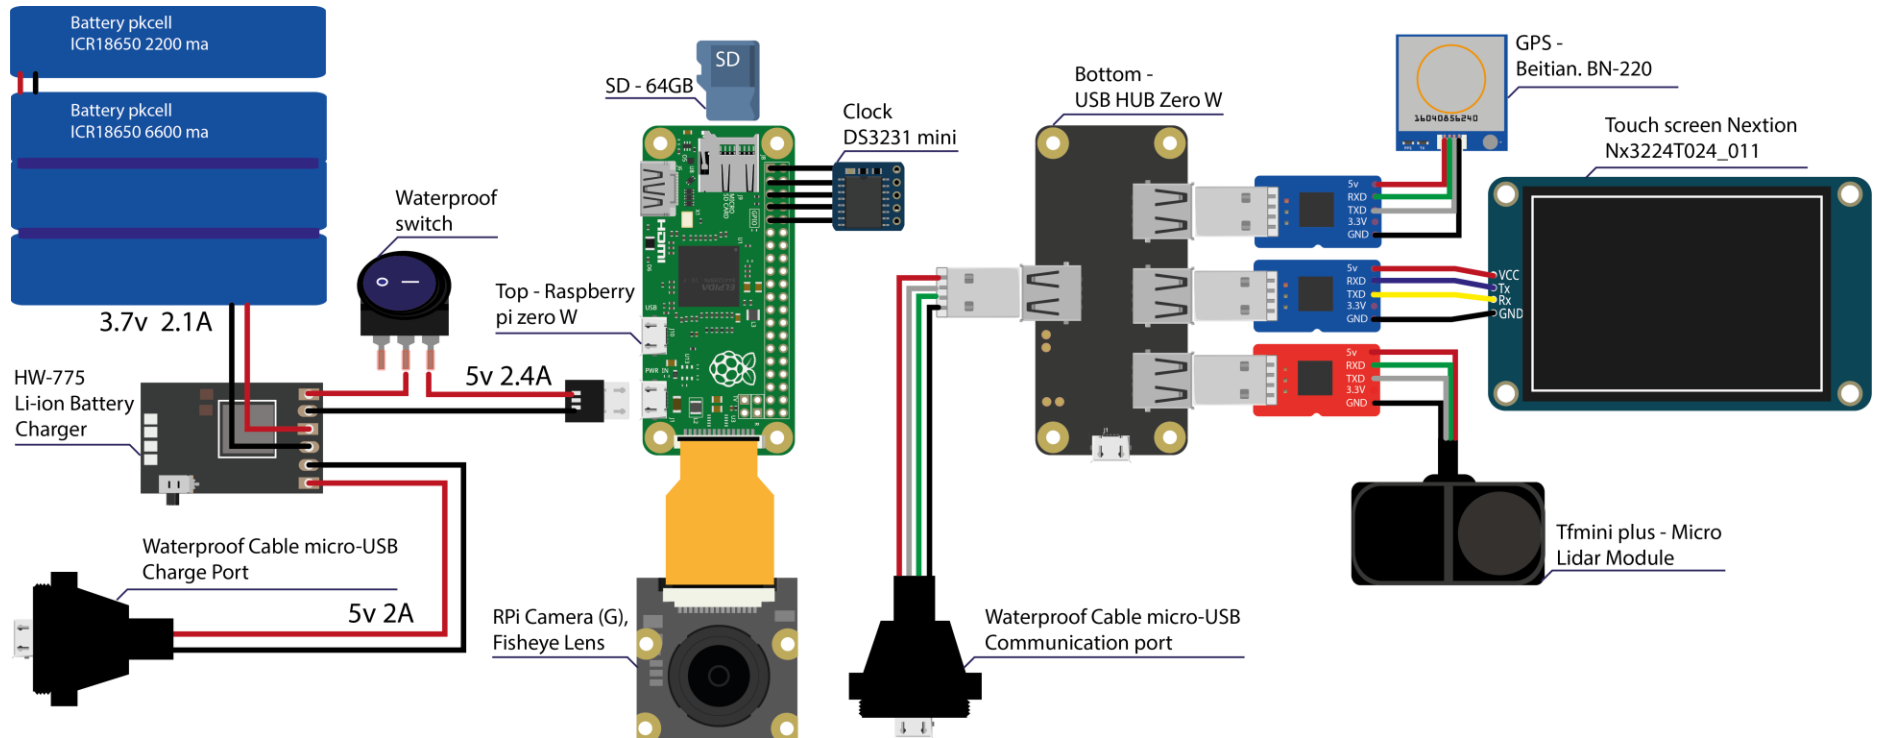

Schematic connection diagram



**Supplementary material for the article: One meter plus (1M+), a multifunctional open source sensor for bicycles based on raspberry pi.**

#### **4. Guide to counting overtaking manoeuvres**

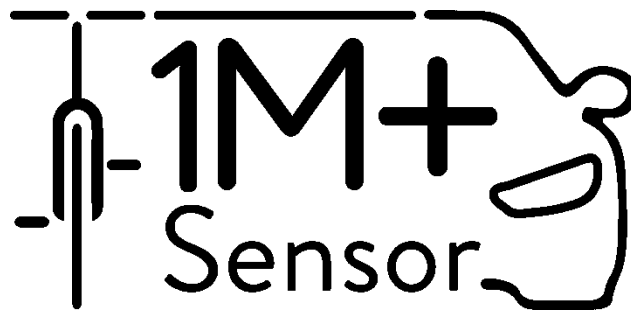

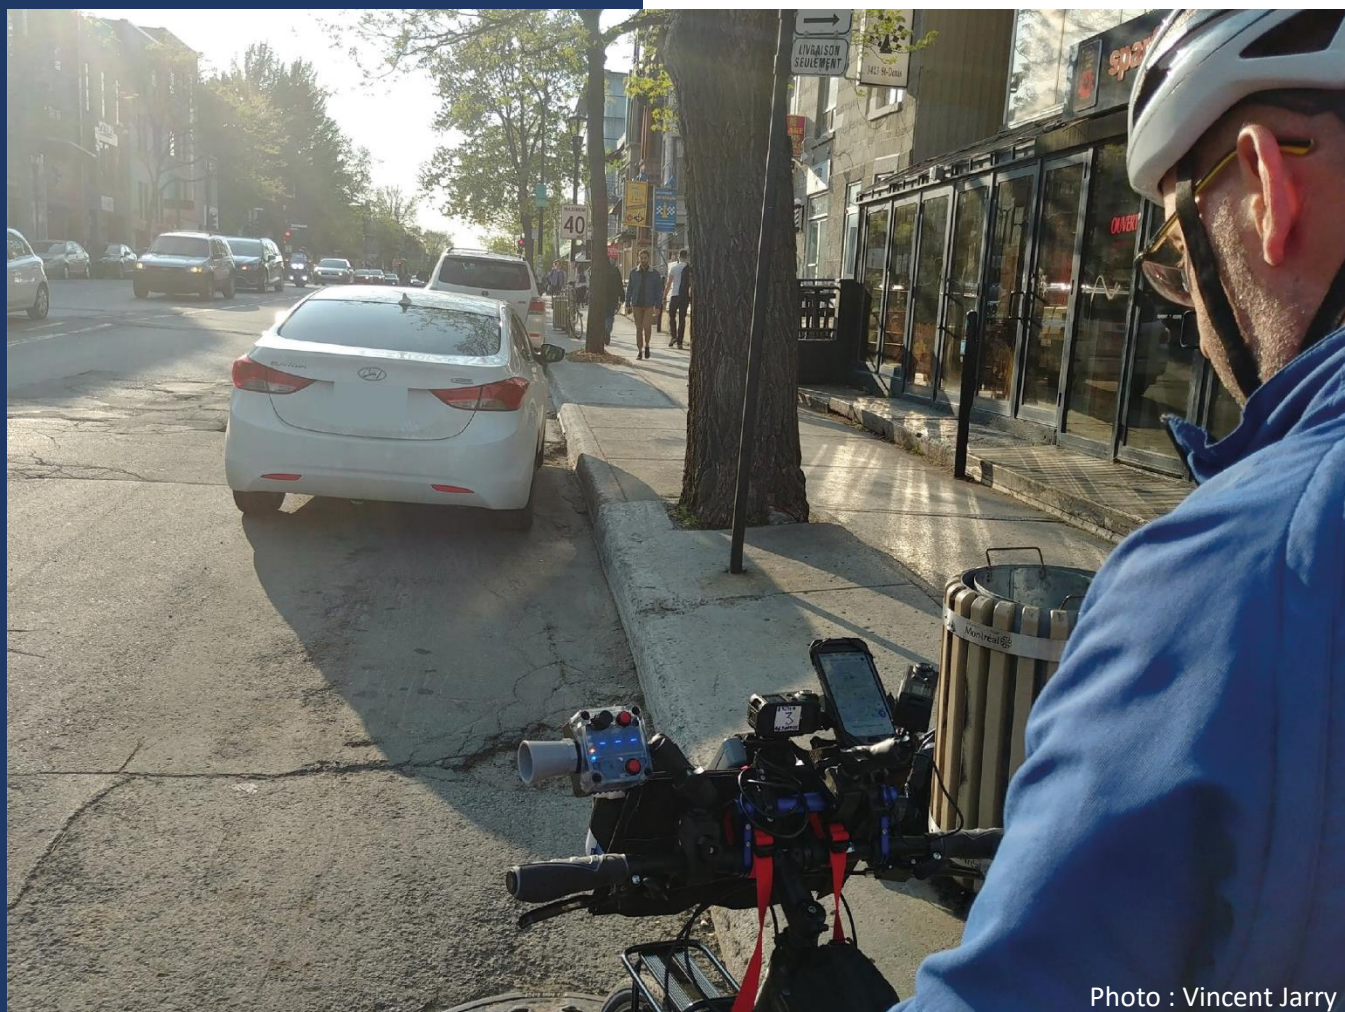

Photo : Vincent Jarry

# Guide to Counting Overtaking Manoeuvres

Supplementary Material to the Article:  
One metre plus (1M+): a multifunctional  
open source sensor for bicycles based  
on raspberry pi.

Objective: Identify the characteristics of  
overtaking manoeuvres over cyclists in  
Montreal.

**Andrés Henao Florez,**

Master's student in Urban Studies (INRS)  
Member of the Environmental Equity  
Laboratory (LAEQ)  
[carlosa.henaof@inrs.ca](mailto:carlosa.henaof@inrs.ca)

**Philippe Apparicio,**

Full Professor at INRS  
Director of the Environmental Equity  
Laboratory (LAEQ)  
[philippe.apparicio@inrs.ca](mailto:philippe.apparicio@inrs.ca)

## 1. Type of Overtaking Manoeuvres

In this section, the different types of overtaking manoeuvres considered in the research project are described.

### 1.1. Type 1: Passing alongside and returning to the cyclist's line.

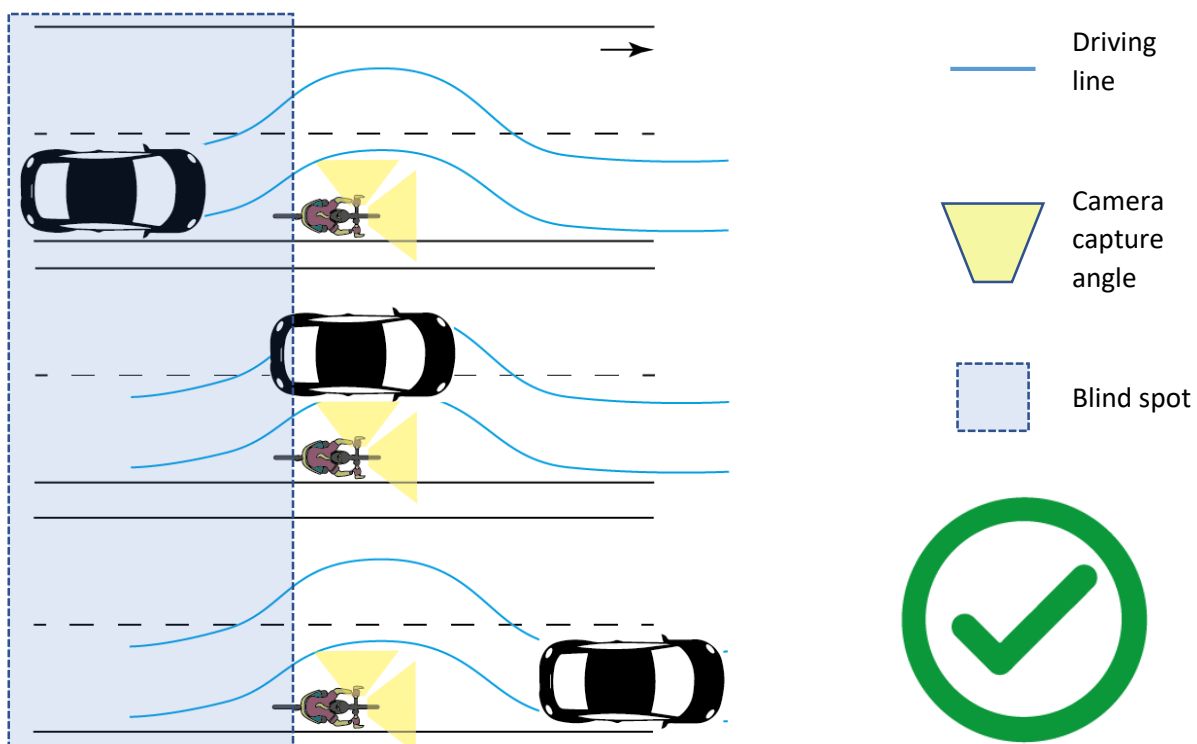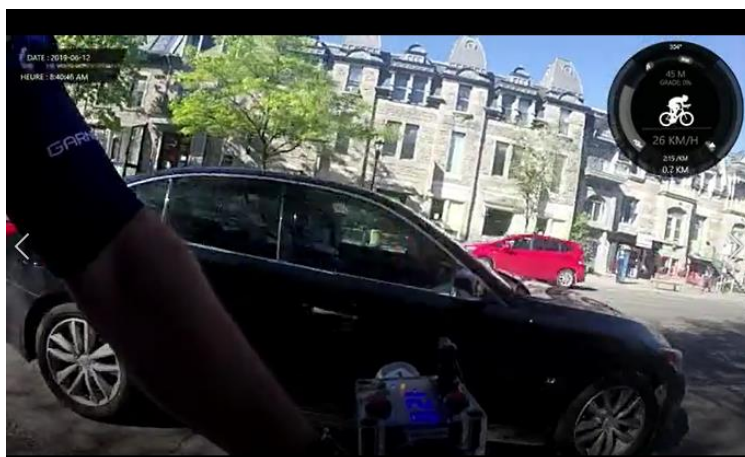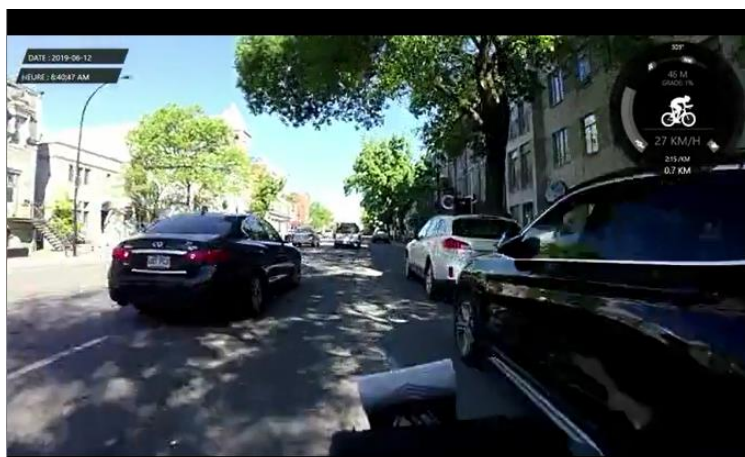



## 1.2. Type 2: Passing alongside and returning to the cyclist's line.

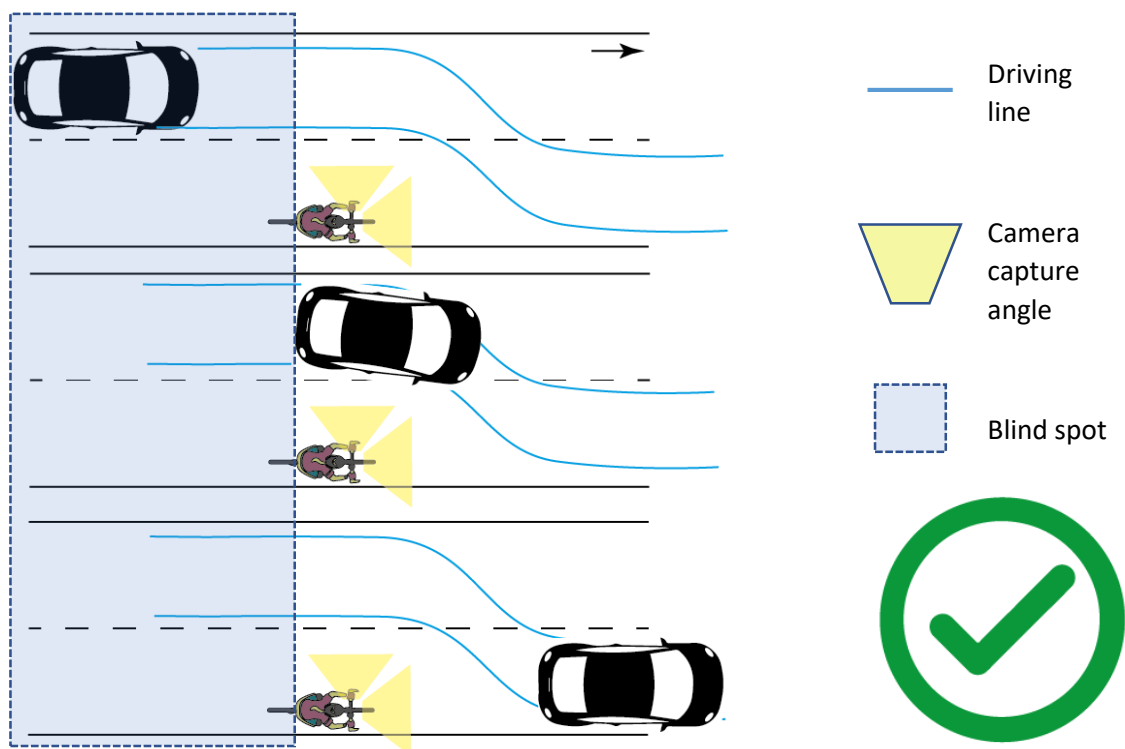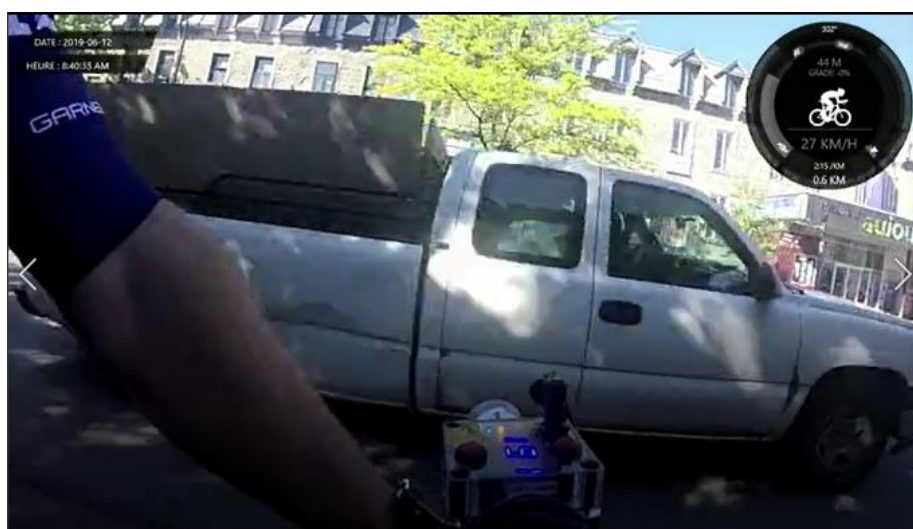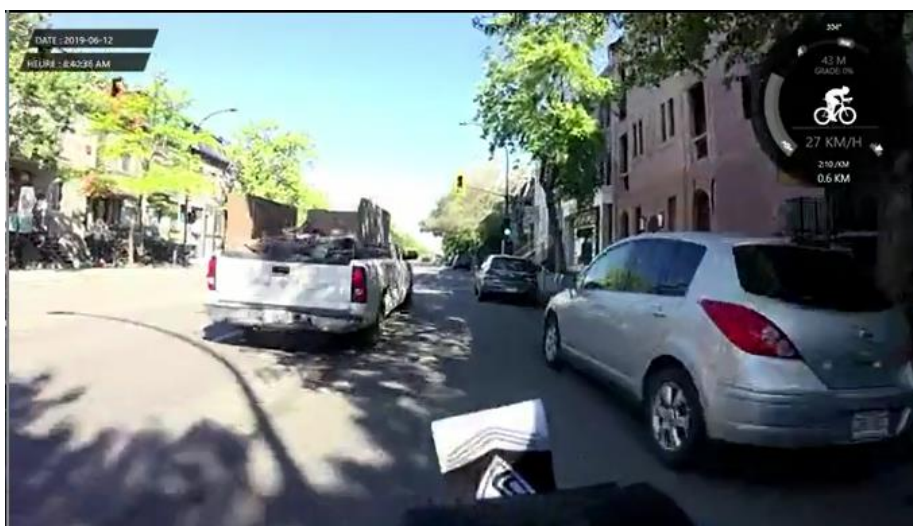

### 1.3. Type 3: Passing alongside a cycle lane.

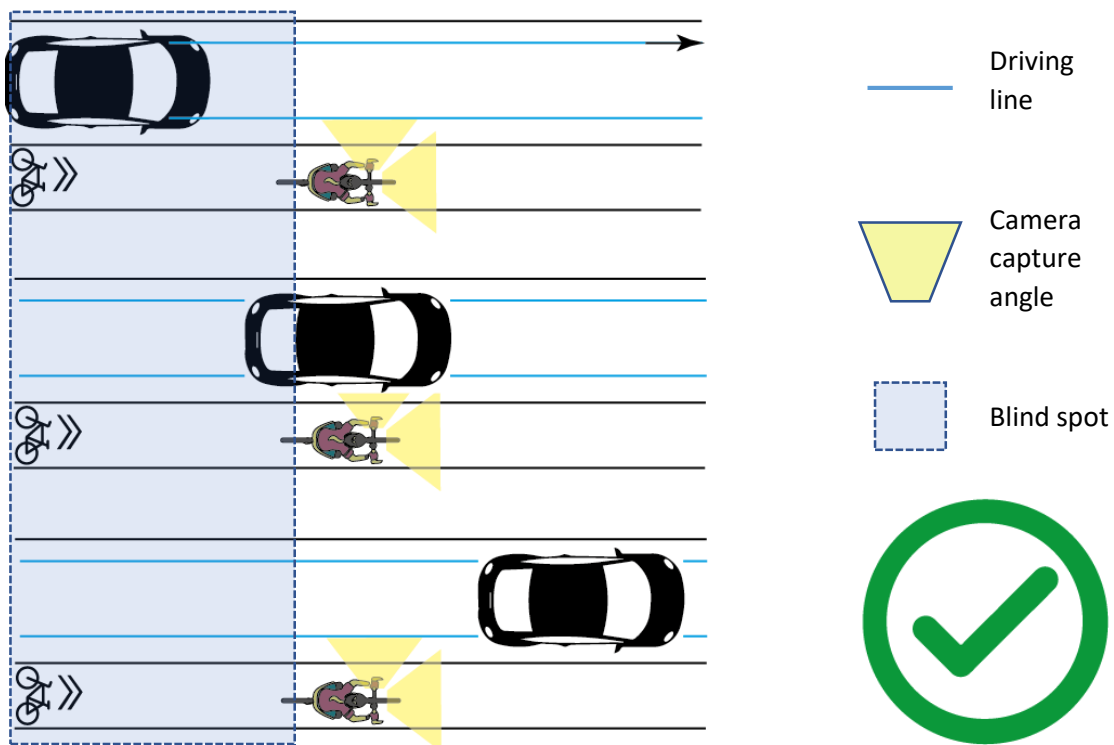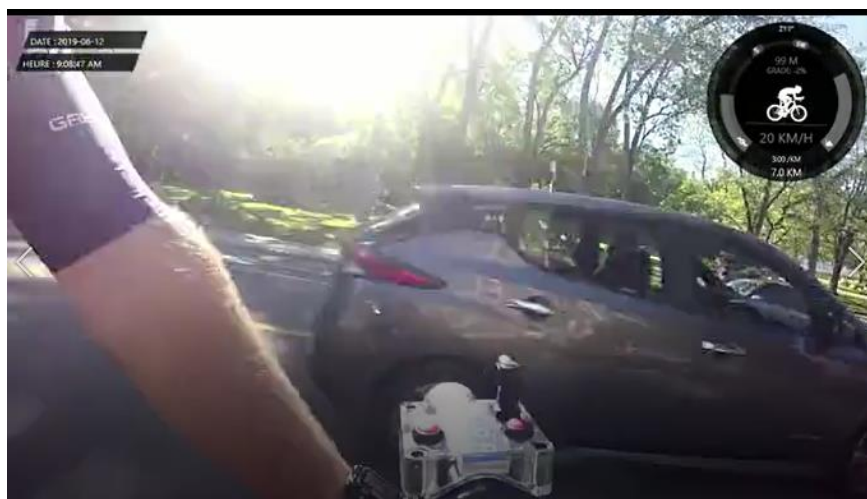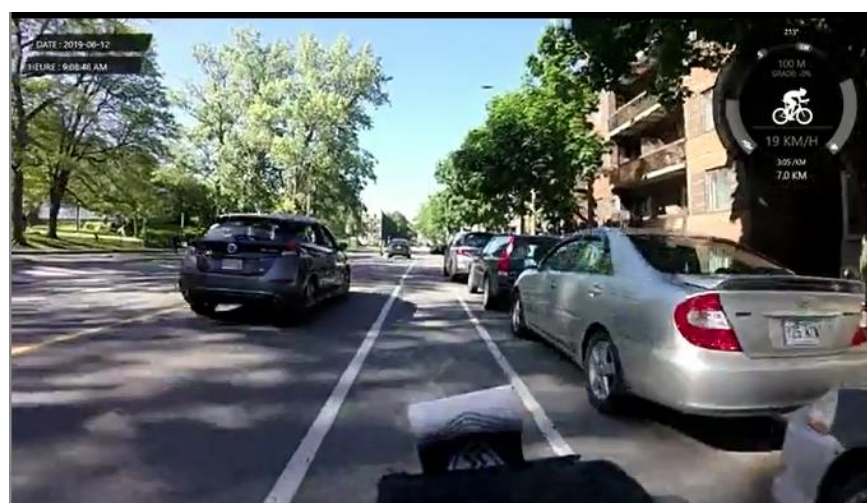

1.4. Type 4: Overtaking a cyclist by encroaching on their lane. The dividing line must be visible.

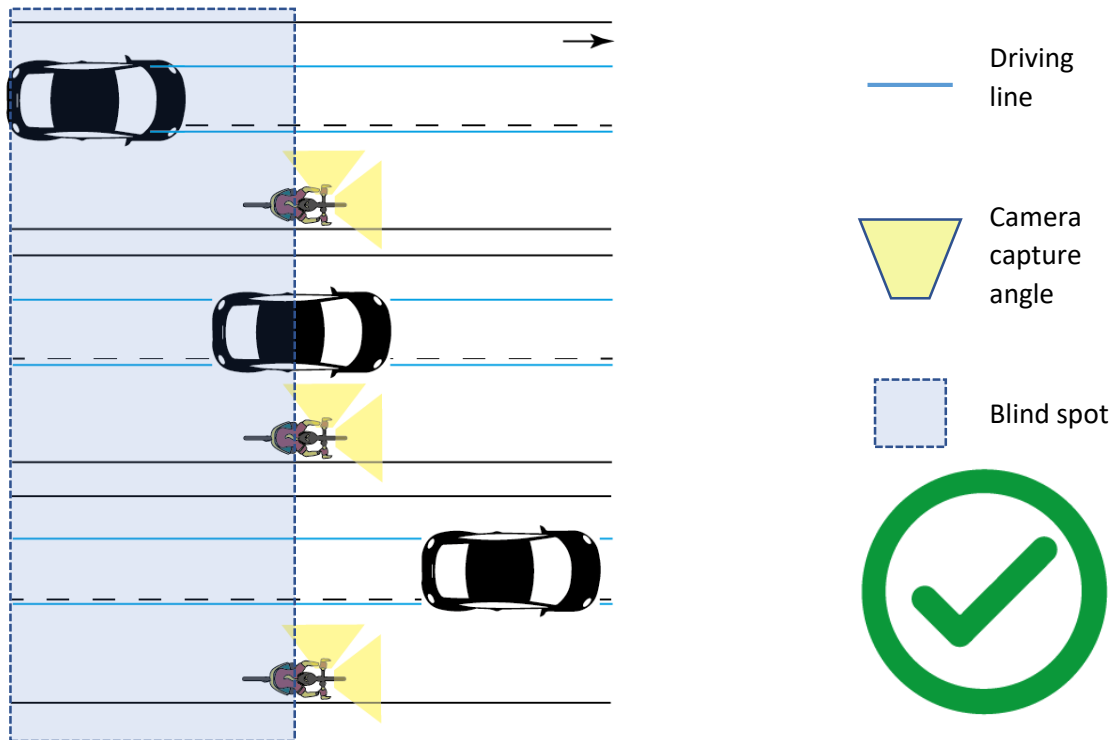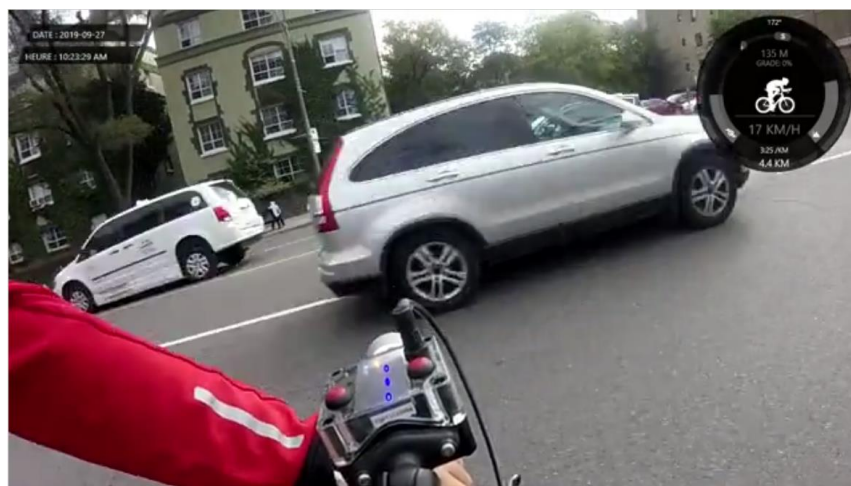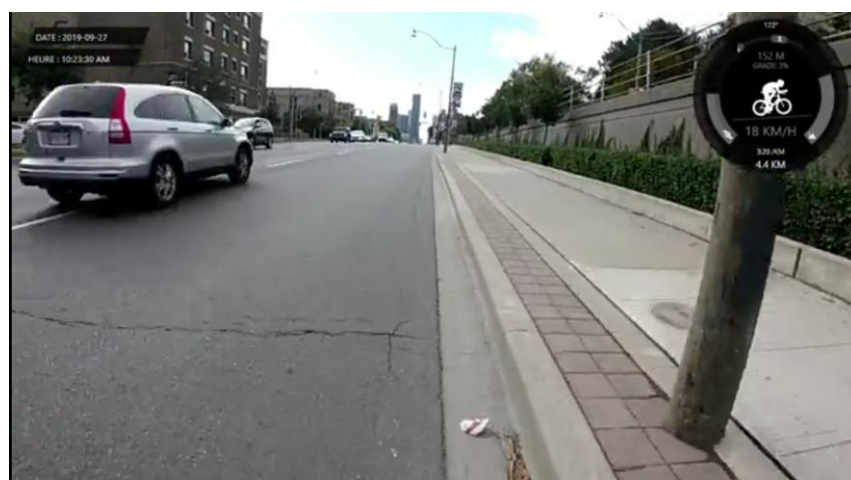

**1.5.** Passing a cyclist in the second lane is not considered an overtaking manoeuvre. The dividing line must be visible.

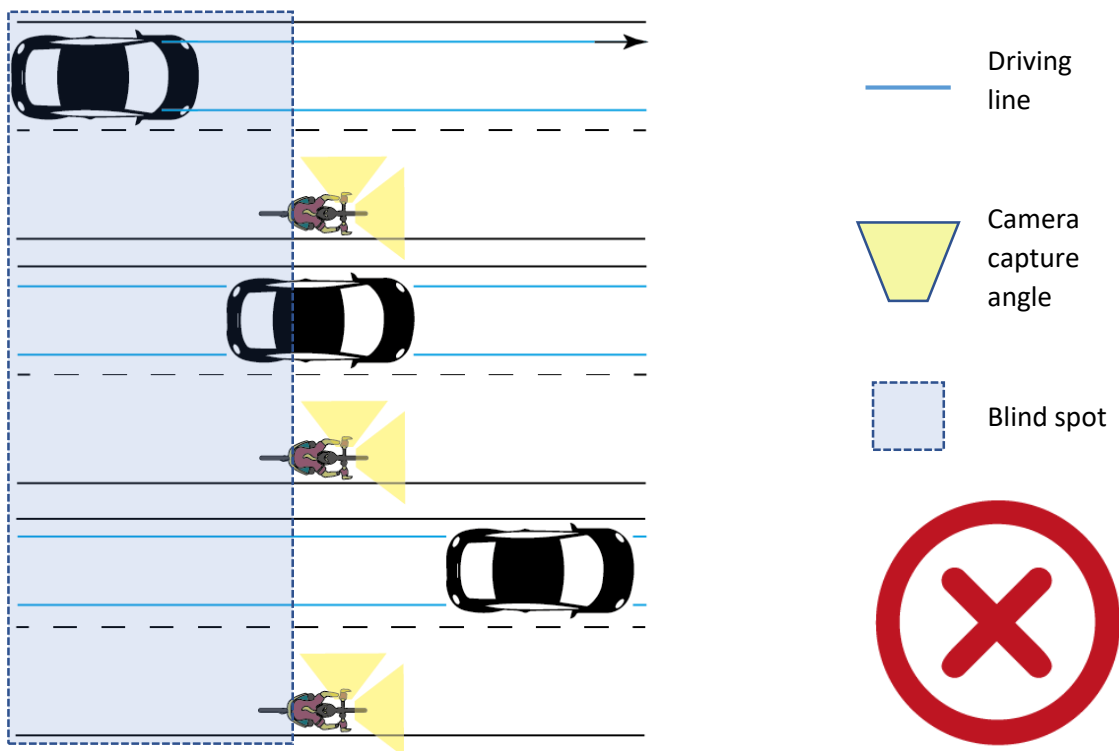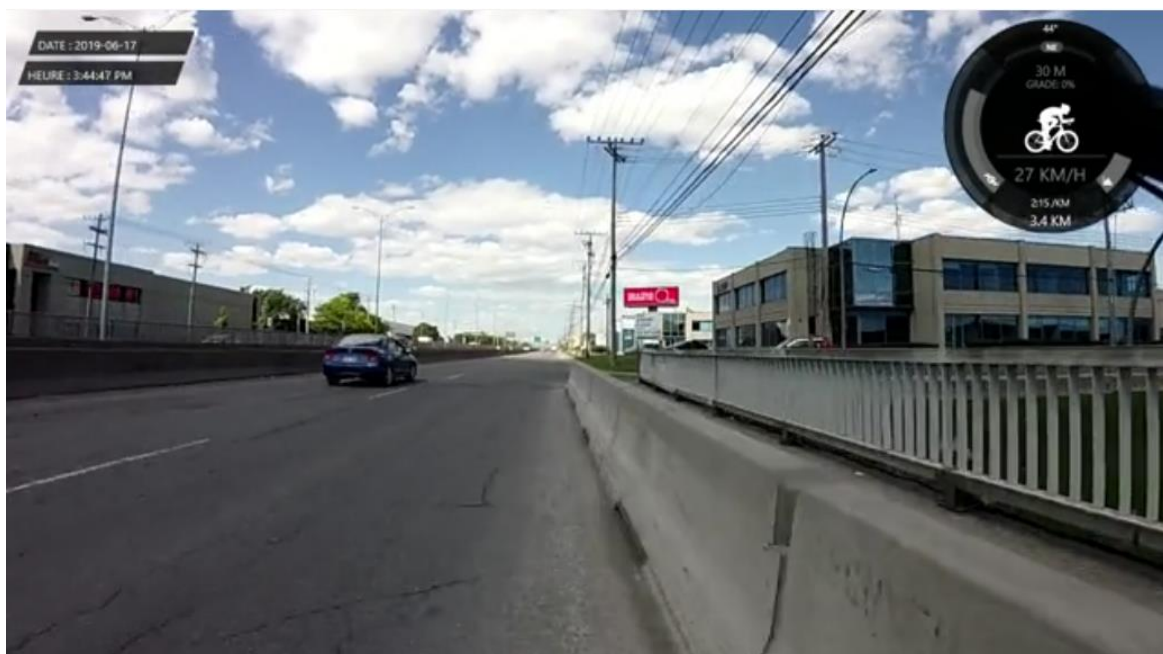



1.6. Type 5: In the absence of a demarcation line or a blurred demarcation, any passage is considered as an overtaking manoeuvre.

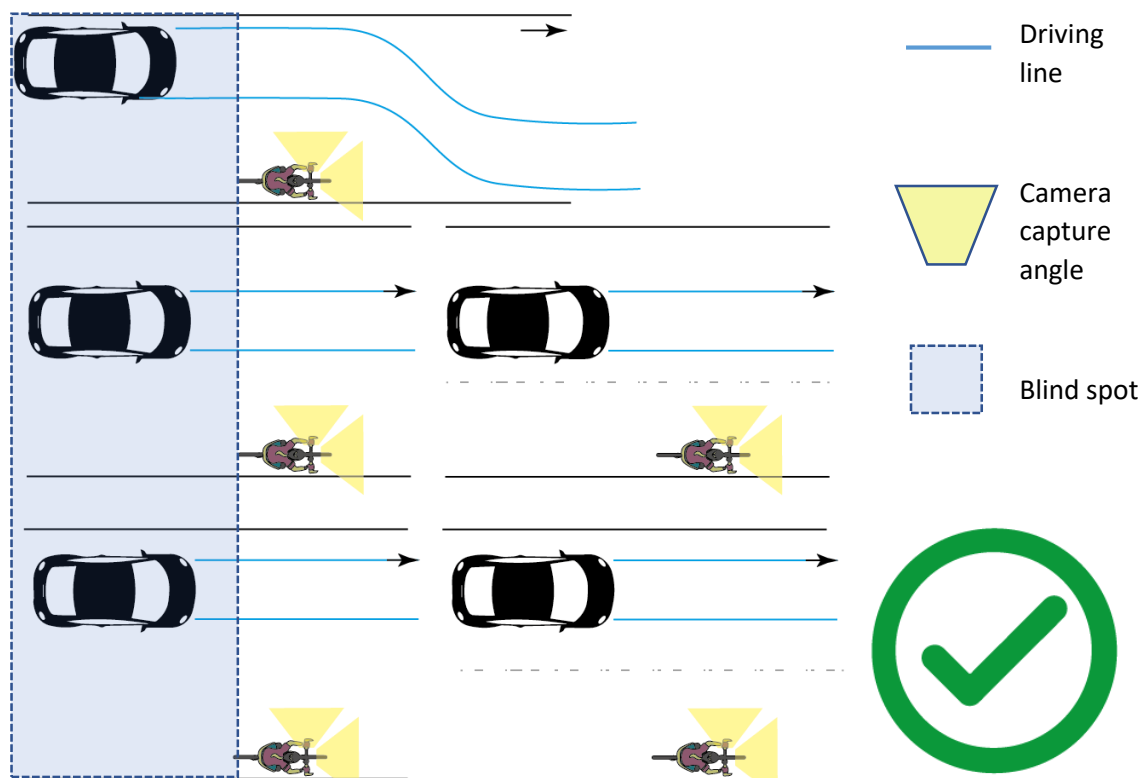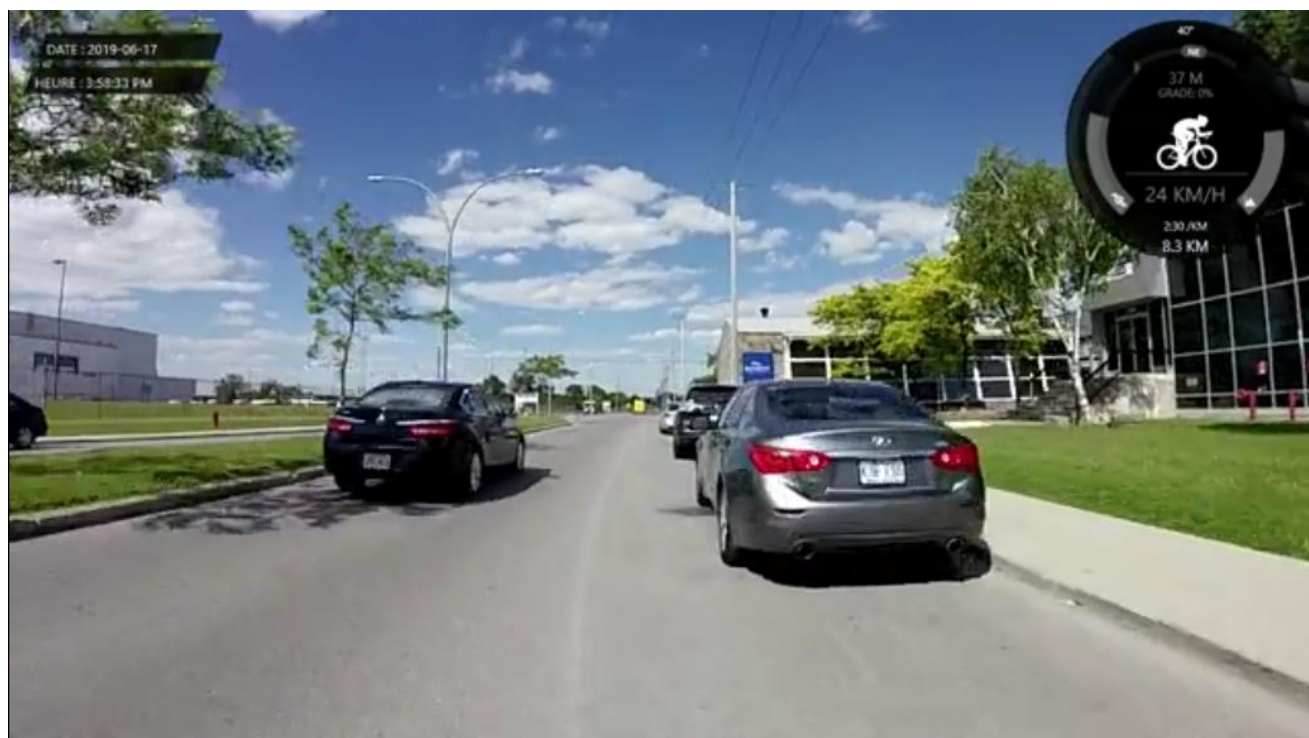



1.1. Type 6: When vehicles are parked on the road and a vehicle approaches a cyclist from the second or third lane: the examples in the figure should be considered as an overtaking manoeuvre.

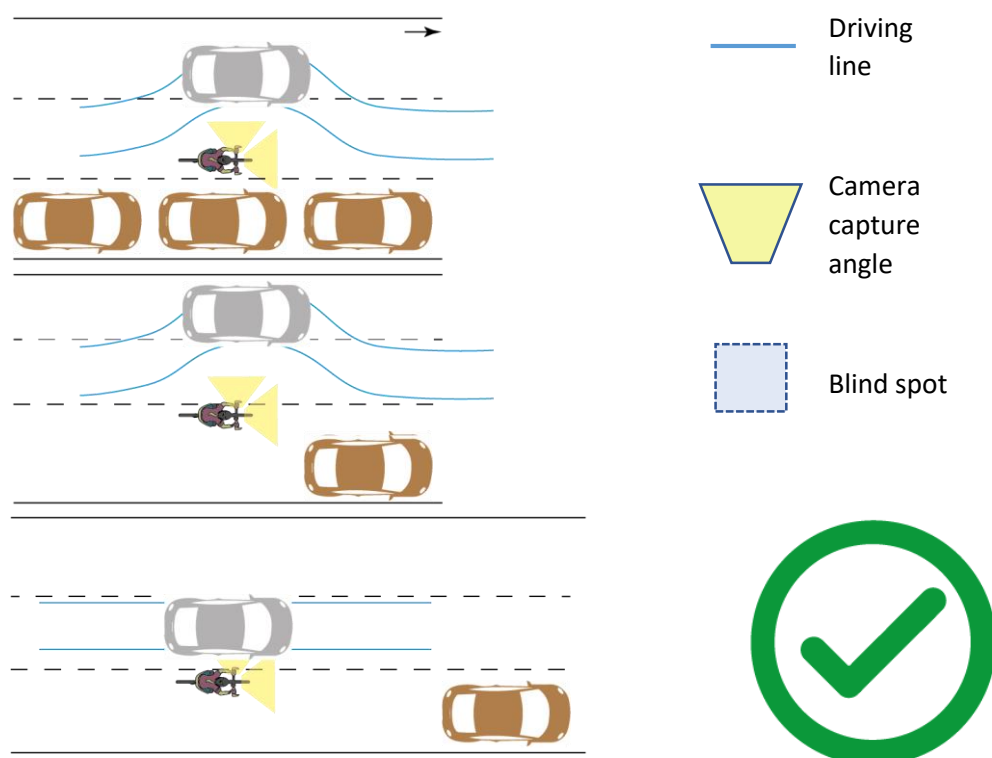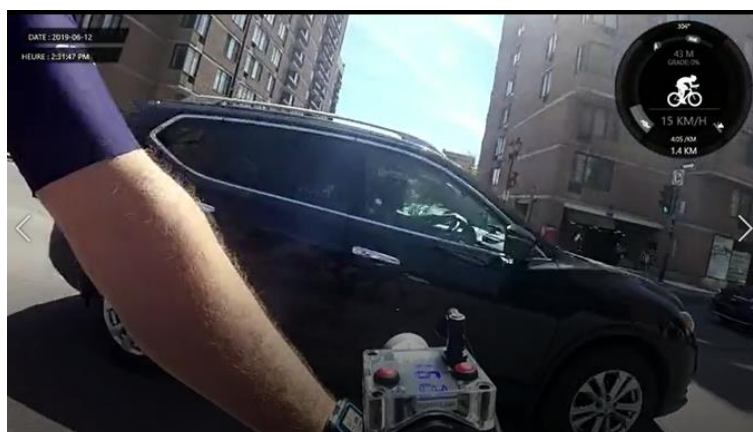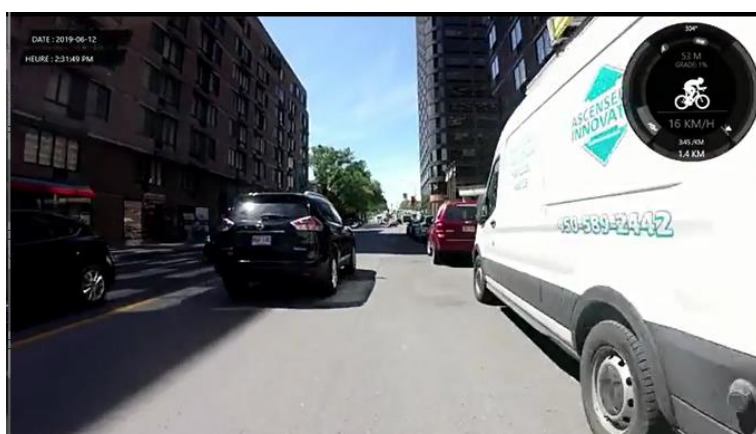

- 1.2.** Overtaking during a red light: the passage of the parked car (the black vehicle in the figure) that starts to move alongside the cyclist is not considered as an overtaking manoeuvre. However, the passing of the second car (blue) is considered as overtaking, on the condition that the last car is outside the angle of vision of the side camera.

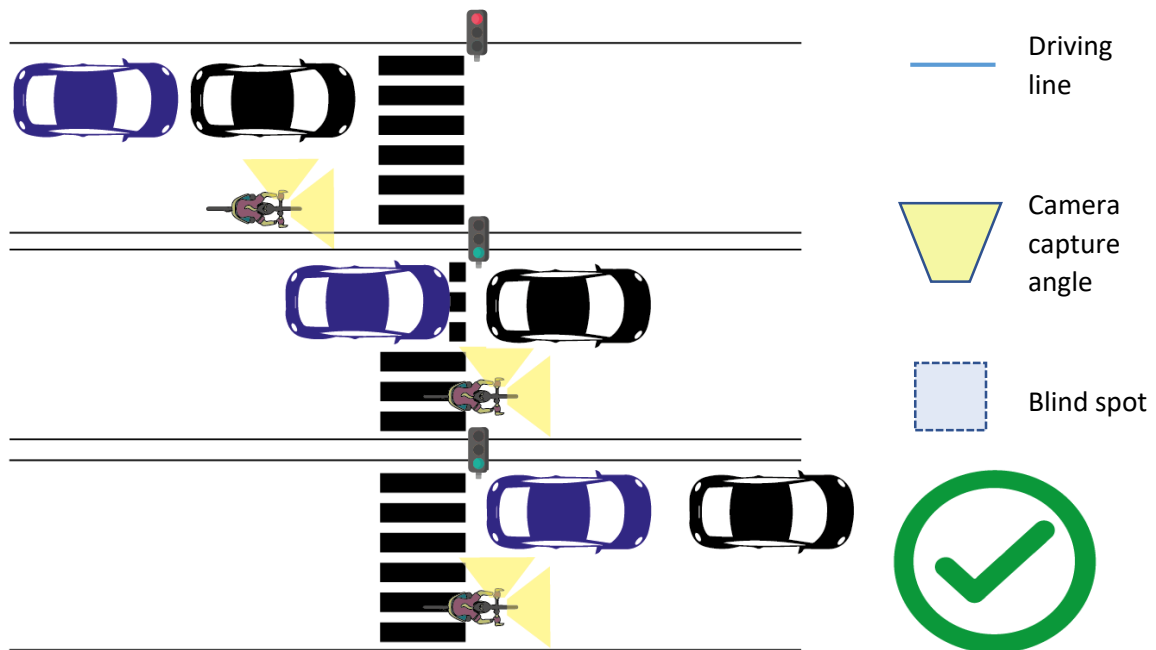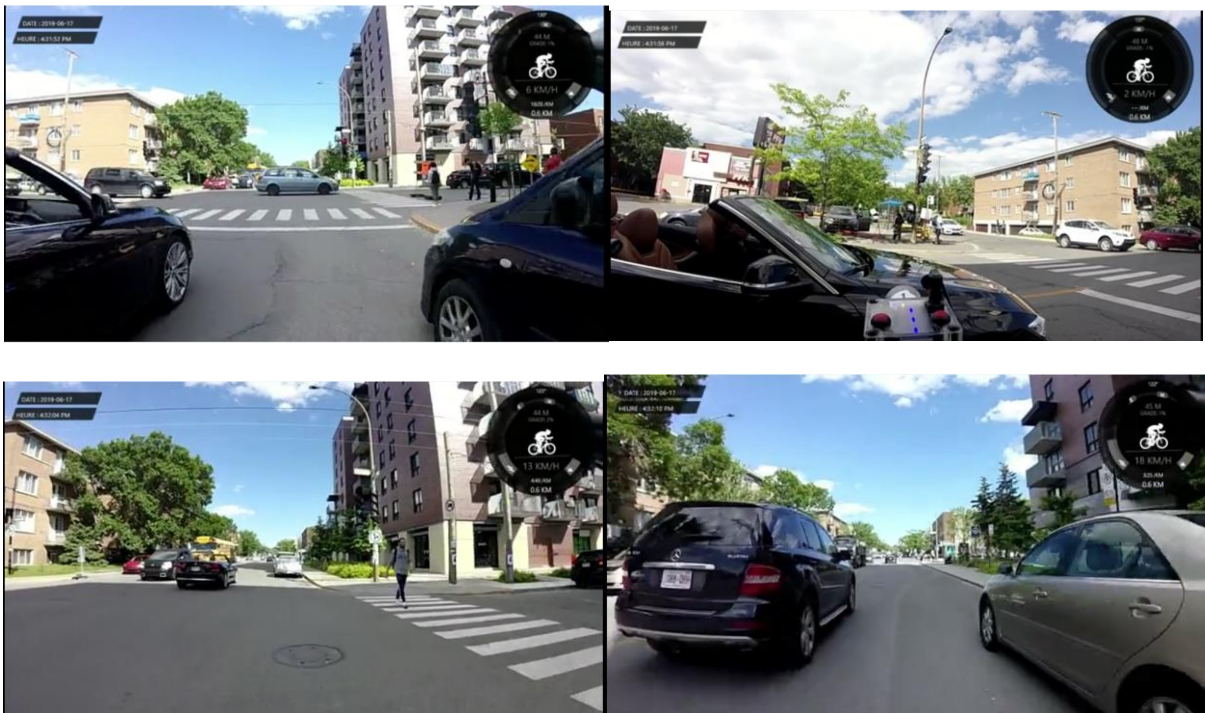

**1.1. Overtaking during an intersection:** If the cyclist is completely stopped at a stop-controlled intersection, the traffic light rule applies. A stopped car (in the figure, the black car), which then starts to move next to the cyclist, is not considered to be an overtaking manoeuvre. The passing of the second (blue) car is considered to be overtaking, on the condition that the last car is outside the angle of vision of the side camera.

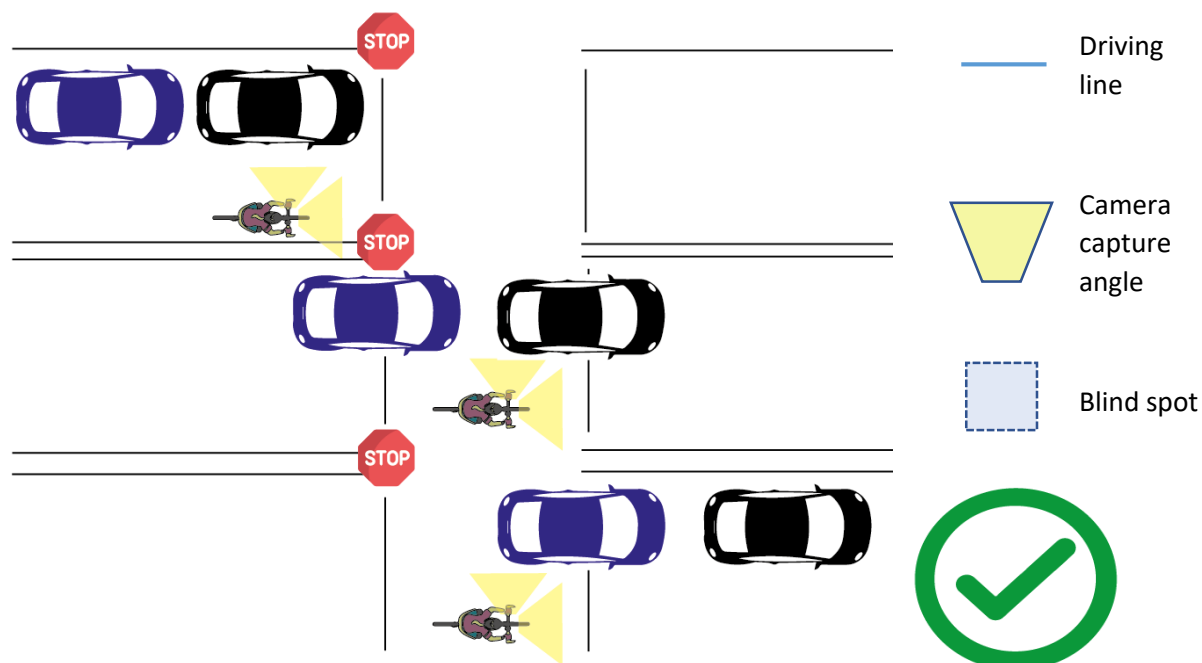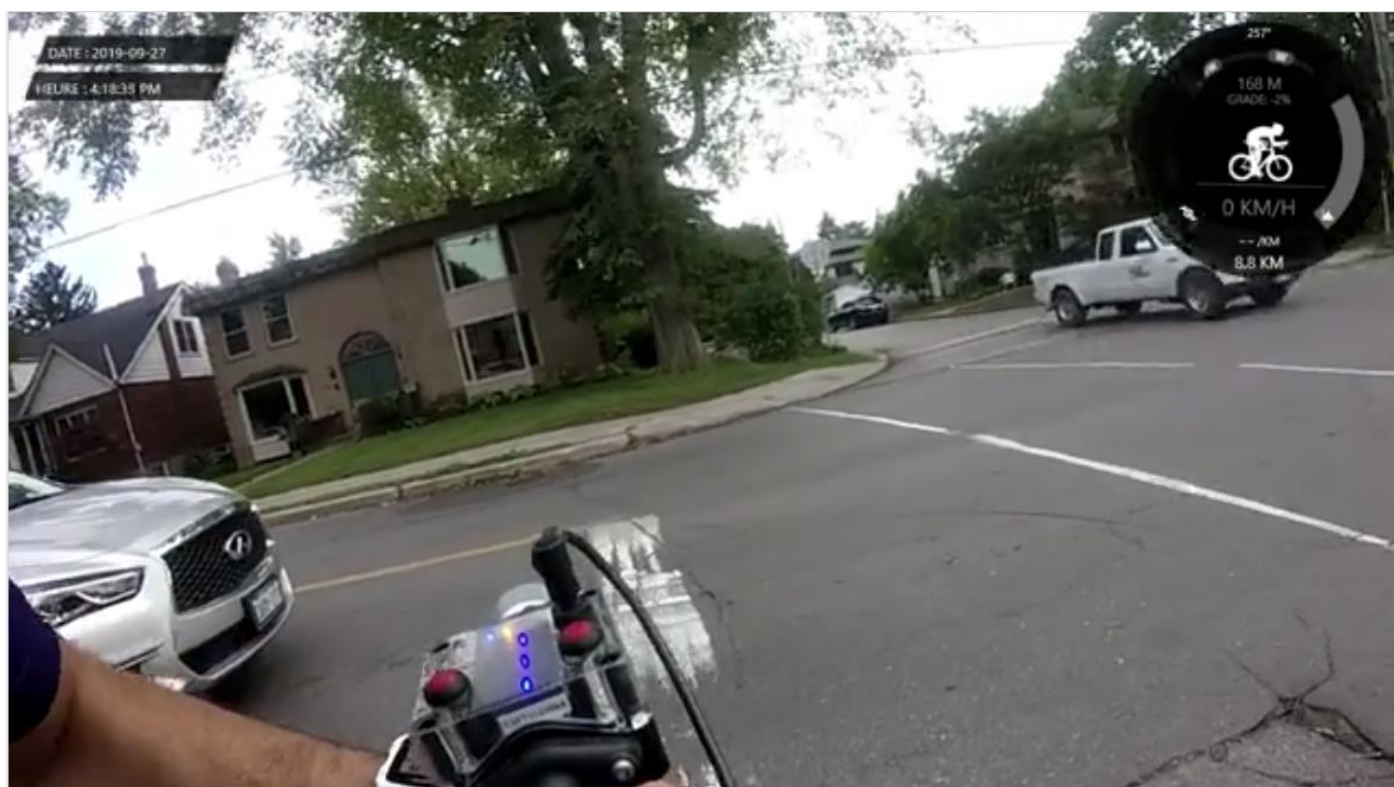

## 1.2. Other Considerations

If the cyclist is riding in a double cycle lane or if the cyclist is surrounded by vehicles parked in the road, the passing of the vehicle is not considered an overtaking manoeuvre.

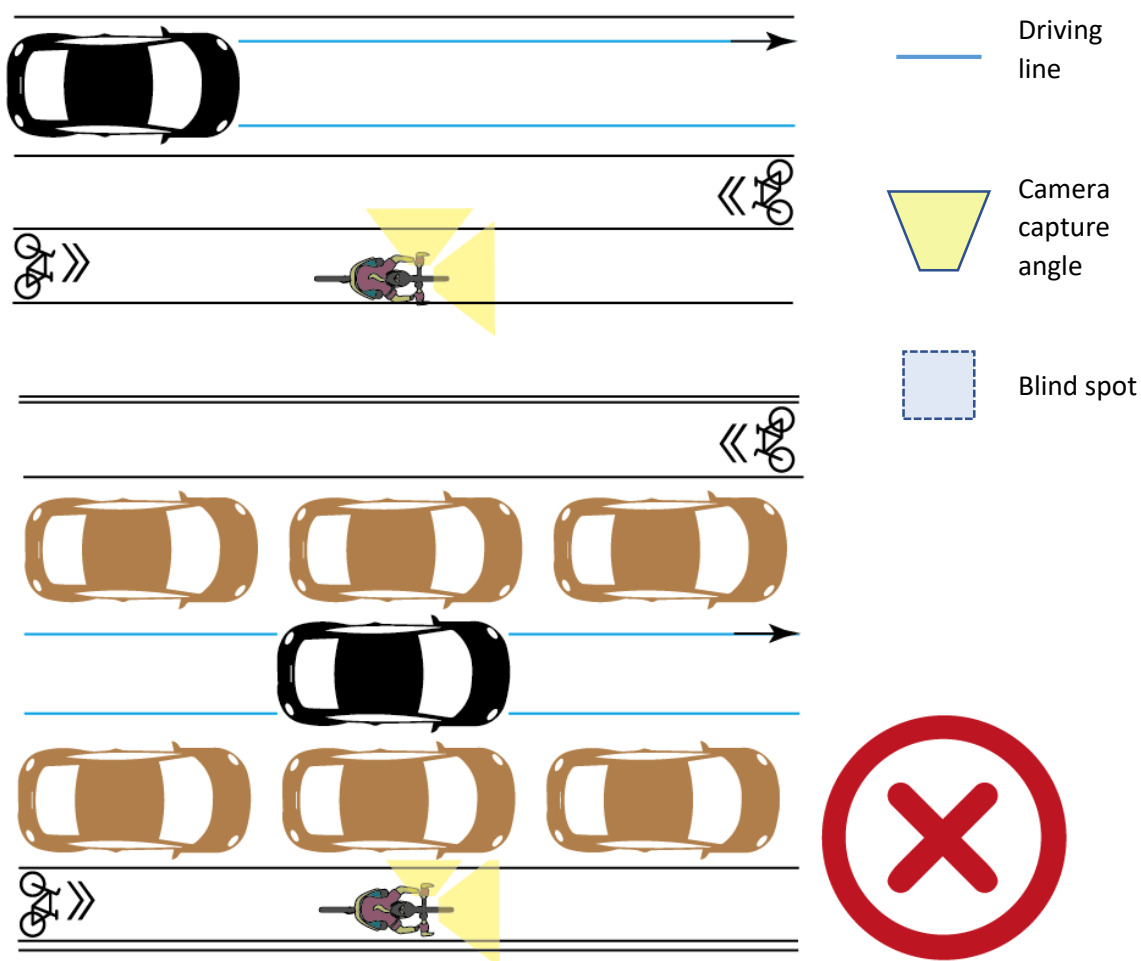



## 2. Type of Vehicle:

This section defines the five different types of vehicles in the research:

1. Standard car
2. Pick-up
3. Truck
4. Bus
5. Other

### 2.1. Standard Car

To facilitate the coding and classification system, we use the reference silhouettes to identify the type of car.

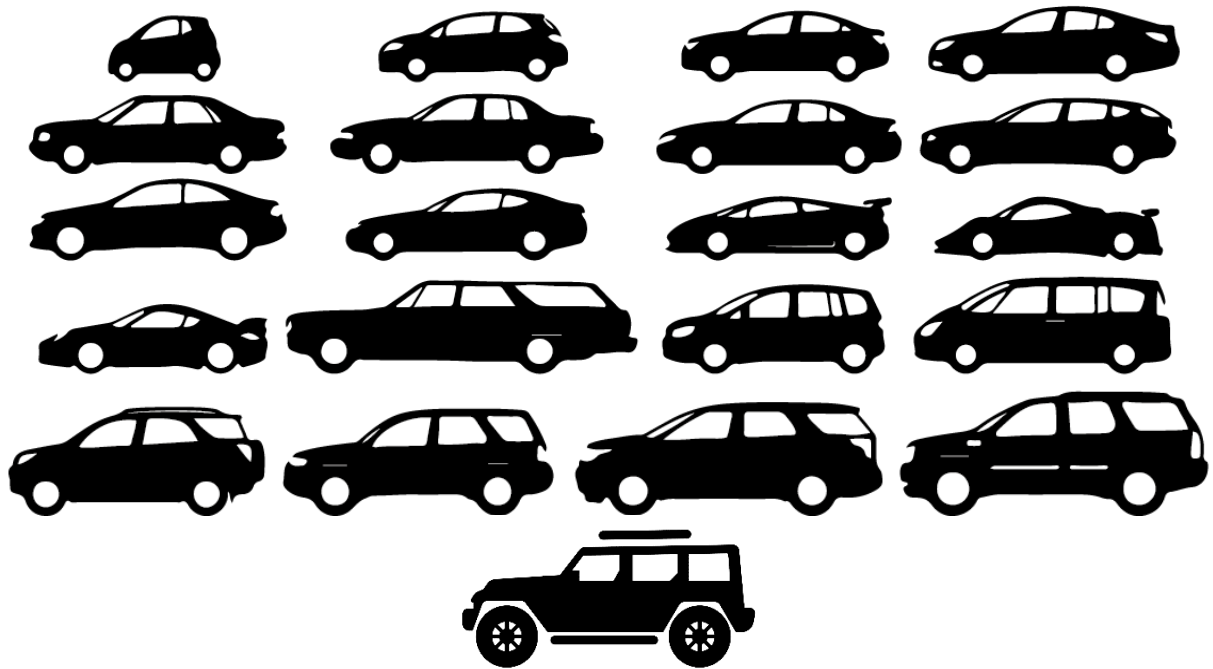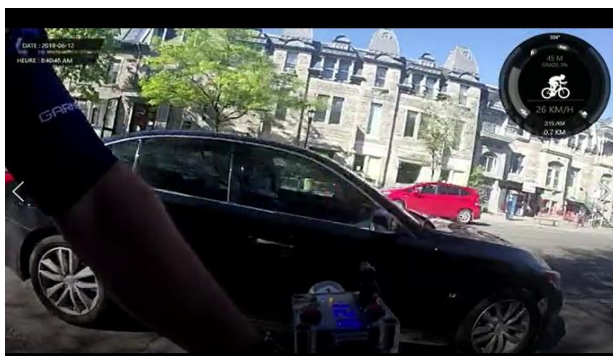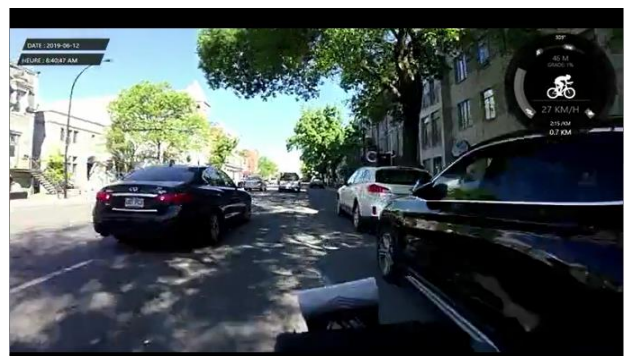

## 2.2. Pick-Up

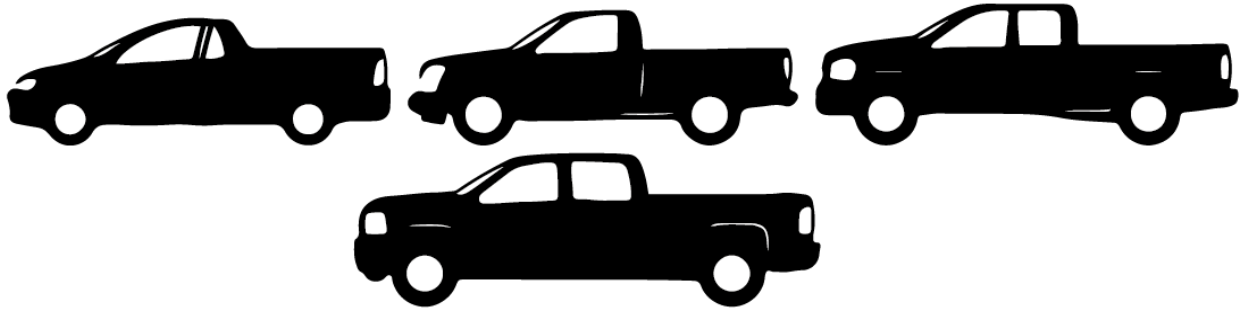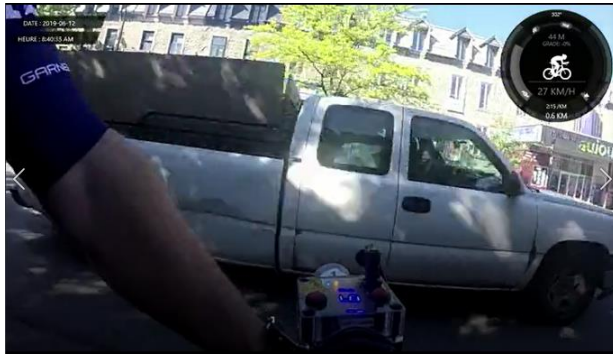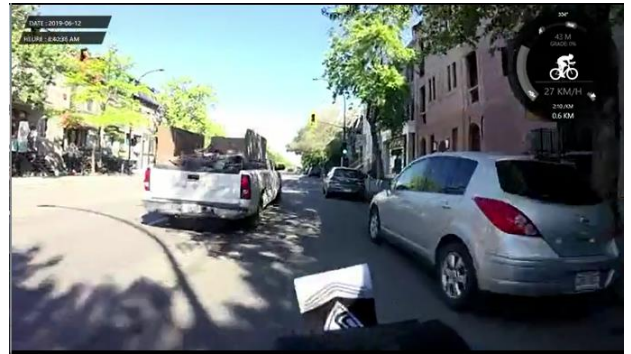

### 2.3. Truck

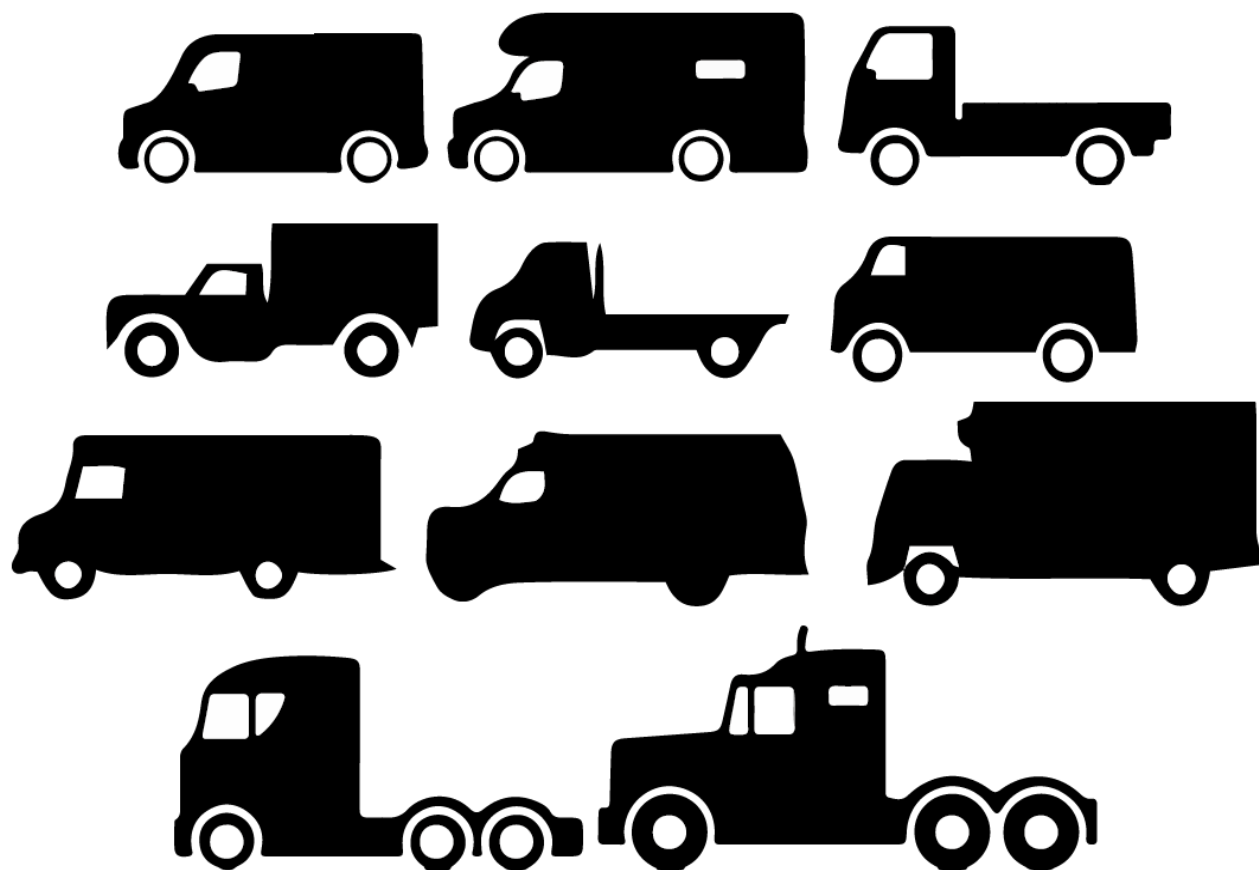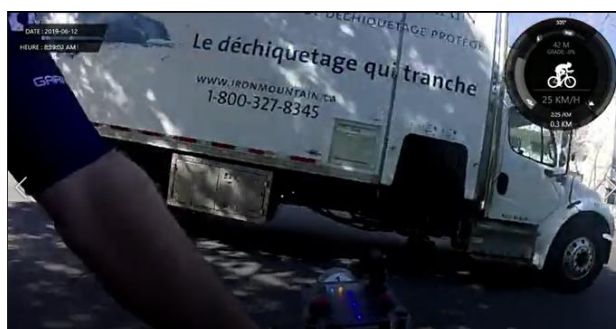

## 2.4. Bus

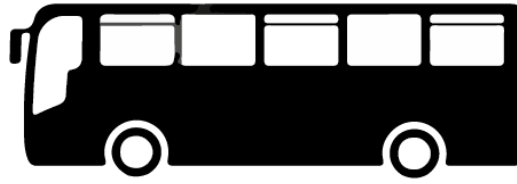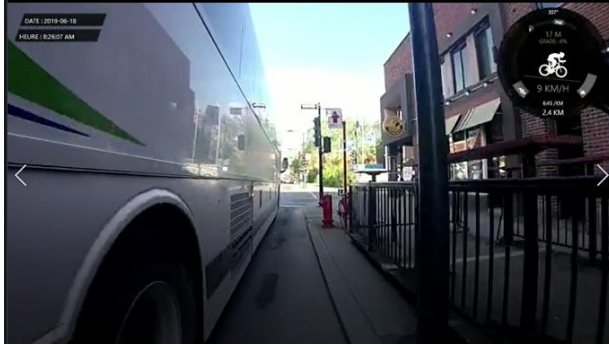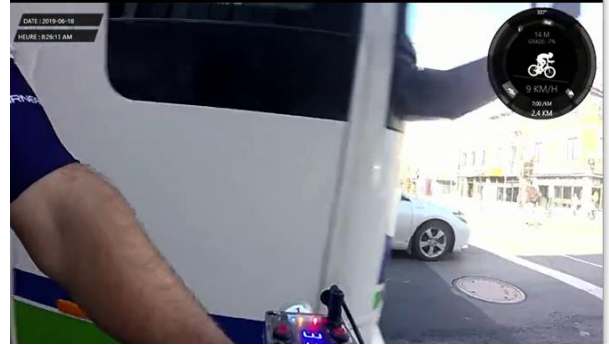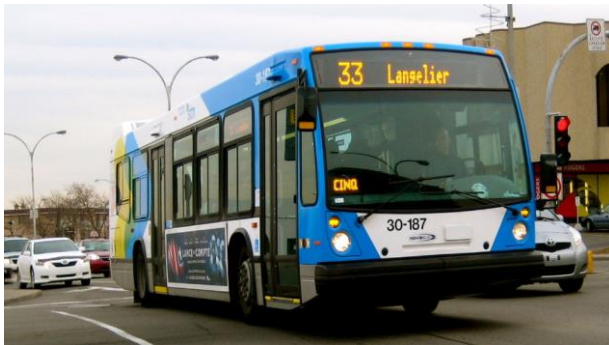



## 2.5. Other

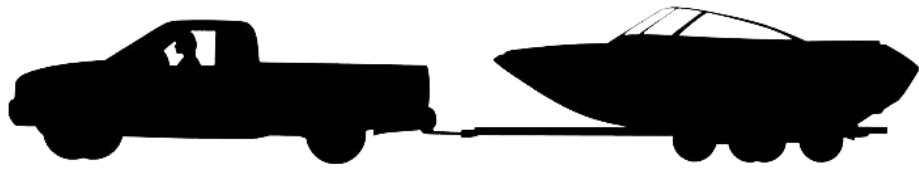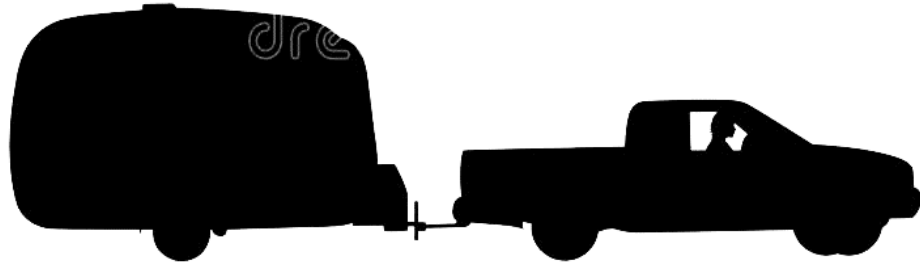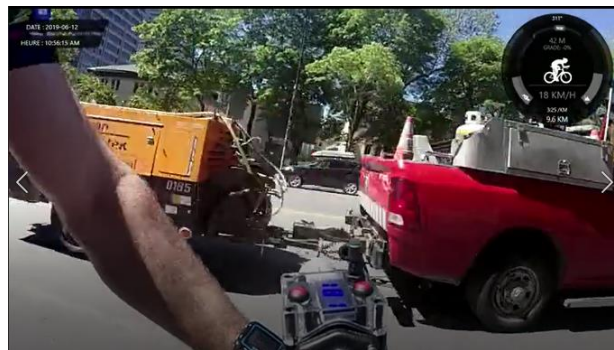

When an overtake is identified, the analyst should place an observation in Vifeco<sup>1</sup> at the start of the overtaking manoeuvre (aligned to the handlebars) and at the end, as shown in the figure.

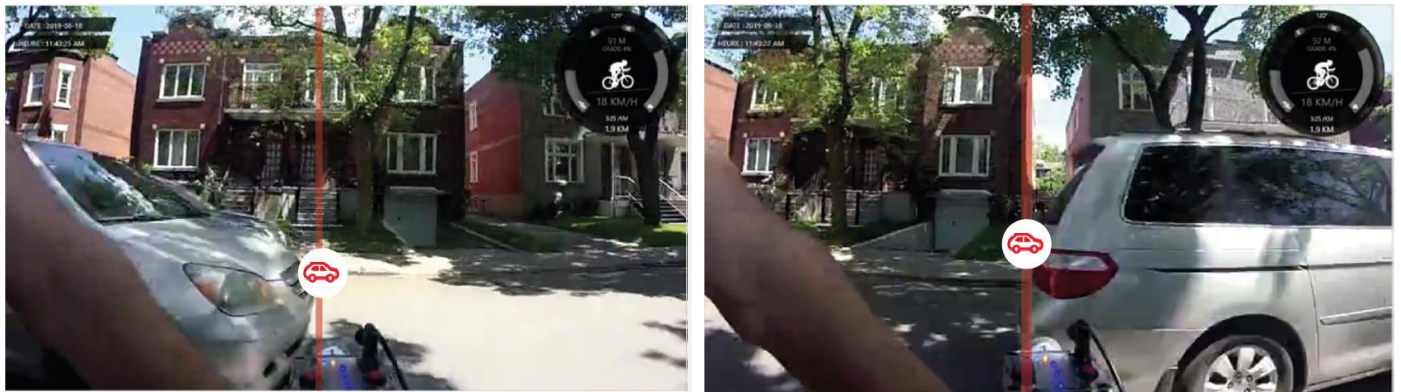

---

<sup>1</sup> an open-source software that allows to annotate several features on videos ([link](#))

## Summary of the Guide to Counting Overtaking Manoeuvres– Andrés Henao et Philippe Apparicio

1. Identify whether there is an overtaking manoeuvre according to the defined criteria

2. Identify the type of vehicle passing the cyclist

### Standard car

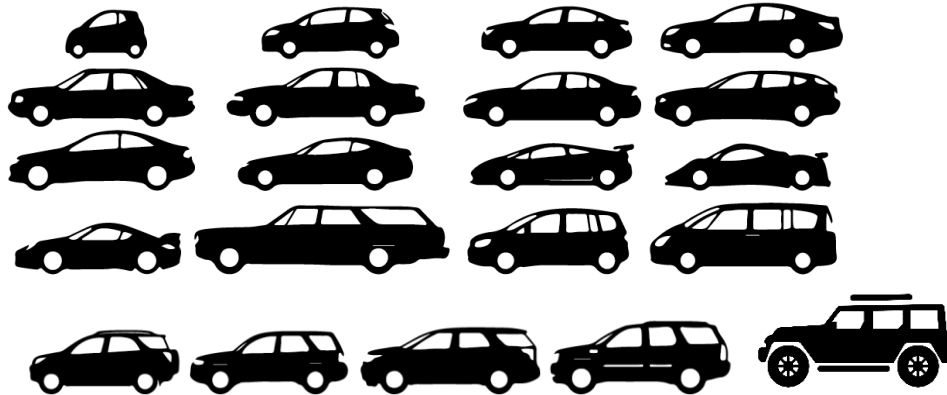

### Pick-up

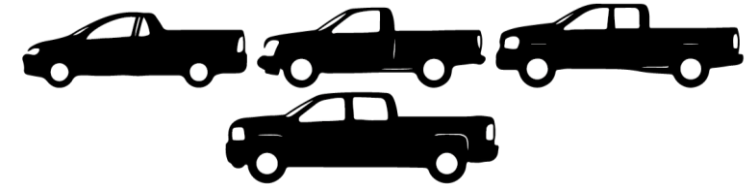

### Truck

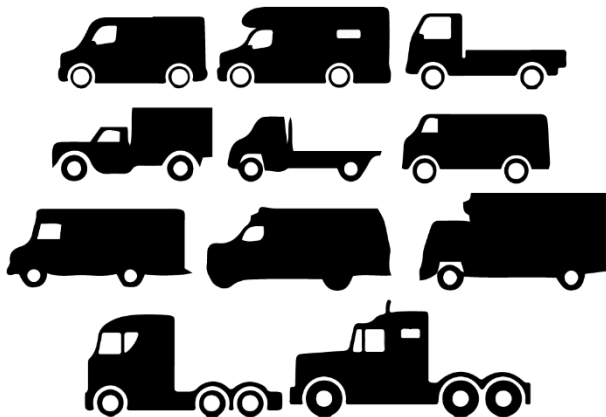

### Bus

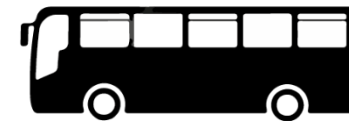

### Other

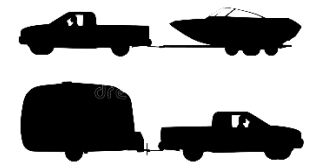

Supplement: s1 [file s1]
